# Supplementary material for: Synthesis of Novel Thiazole Derivatives Bearing β-Amino Acid and Aromatic Moieties as Promising Scaffolds for the Development of New Antibacterial and Antifungal Candidates Targeting Multidrug-Resistant Pathogens
Source: MDPI journal article supplement (doi:10.3390/molecules27010074), 2021-12-23
Supplement: s1 [file s1]

# Synthesis of Novel Thiazole Derivatives Bearing $\beta$ -Amino Acid and Aromatic Moieties as Promising Scaffolds for the Development of New Antibacterial and Antifungal Candidates Targeting Multidrug-Resistant Pathogens

Dovilė Malūkaitė<sup>1</sup>, Birutė Grybaitė<sup>1</sup>, Rita Vaickelionienė<sup>1,\*</sup>, Giedrius Vaickelionis<sup>1</sup>,  
Birutė Sapijanskaitė-Banevič<sup>1</sup>, Povilas Kavaliauskas<sup>1,2,3,4,5</sup> and Vytautas Mickevičius<sup>1</sup>

<sup>1</sup> Department of Organic Chemistry, Kaunas University of Technology, Radvilėnų Rd. 19, LT-50254 Kaunas, Lithuania; dovile.malukaite@ktu.edu (D.M.); birute.grybaite@ktu.lt (B.G.); giedrius.vaickelionis@ktu.lt (G.V.); birute.sapijanskaite@ktu.lt (B.S.-B.); pok4001@med.cornell.edu (P.K); vytautas.mickevicius@ktu.lt (V.M.)

<sup>2</sup> Weill Cornell Medicine of Cornell University, 527 East 68th Street, New York, NY 10065, USA

<sup>3</sup> Institute for Genome Sciences, School of Medicine, University of Maryland, 655 W. Baltimore Street, Baltimore, MD 21201, USA

<sup>4</sup> Biological Research Center, Veterinary Academy, Lithuanian University of Health Sciences, Tilžės Str. 18, LT-47181 Kaunas, Lithuania.

<sup>5</sup> Institute of Infectious Diseases and Pathogenic Microbiology, Birštono str. 38A, Prienai, LT-59116, Lithuania.

\* Correspondence: rita.vaickelioniene@ktu.lt; Tel.: +370 600 16958.

❖ NMR Spectra (1-9, all in DMSO-*d*<sub>6</sub>, Figures S1-S42)

❖ The list of fungal strains used for the study

3-(1-(4-Phenylaminophenyl)thioureido)propanoic acid (**1**)

Figure S1.  $^1\text{H}$  NMR of compound **1**.

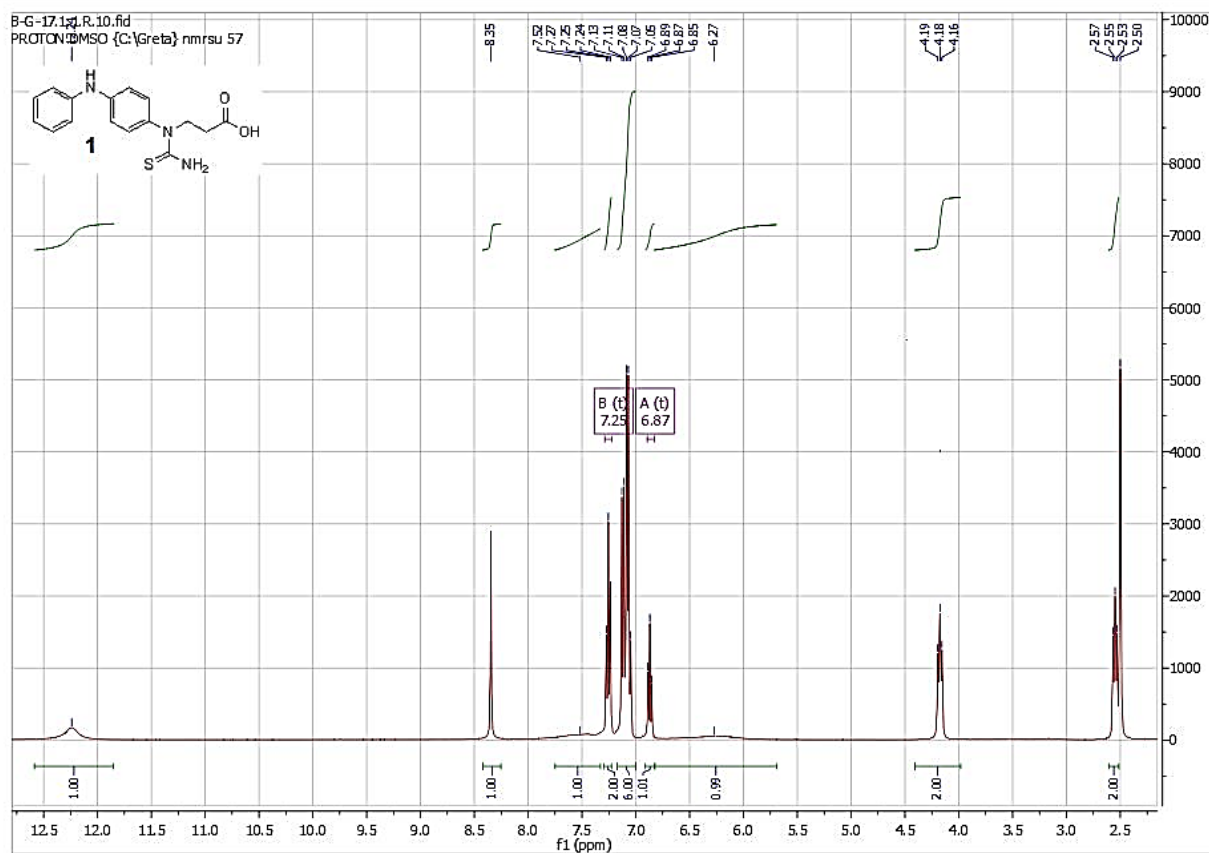

Figure S2:  $^{13}\text{C}$  NMR of compound **1**

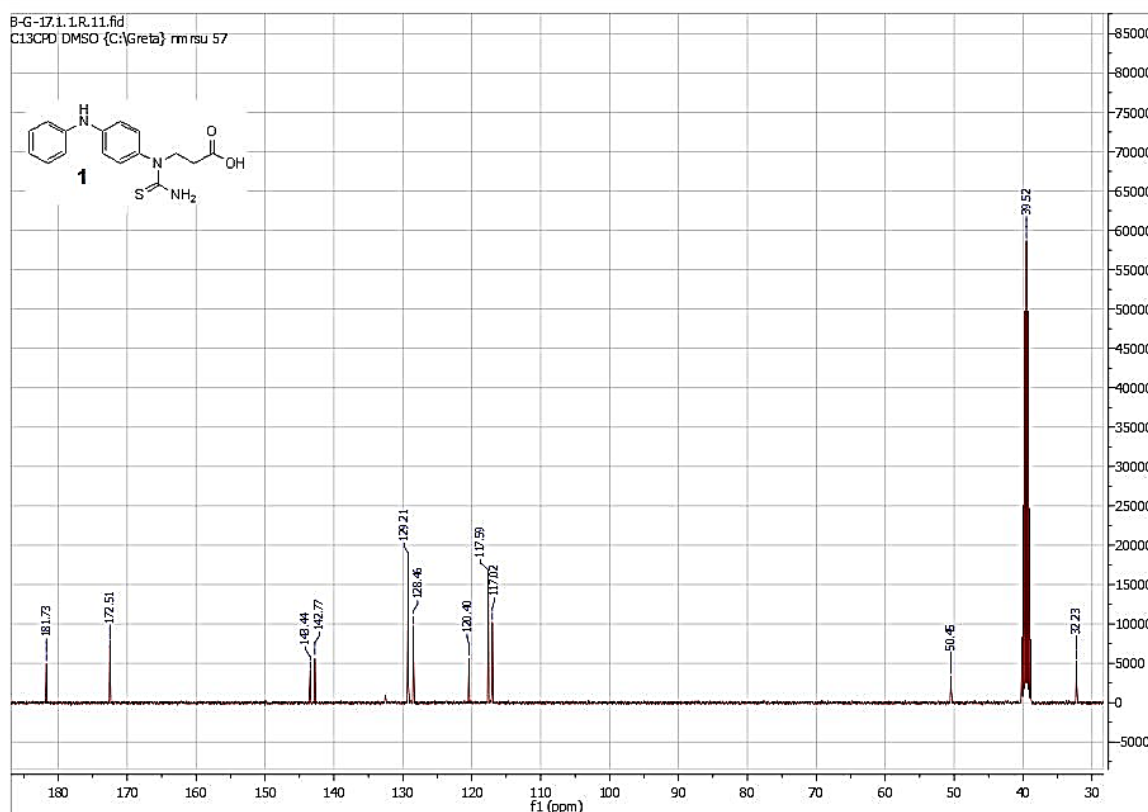

# **Synthesis of thiazoles 2-5**

**3-((4-(4-Fluorophenyl)thiazol-2-yl)(4-(phenylamino)phenyl)amino)propanoic acid (2a):**

**Figure S3: <sup>1</sup>H NMR of compound 2a**

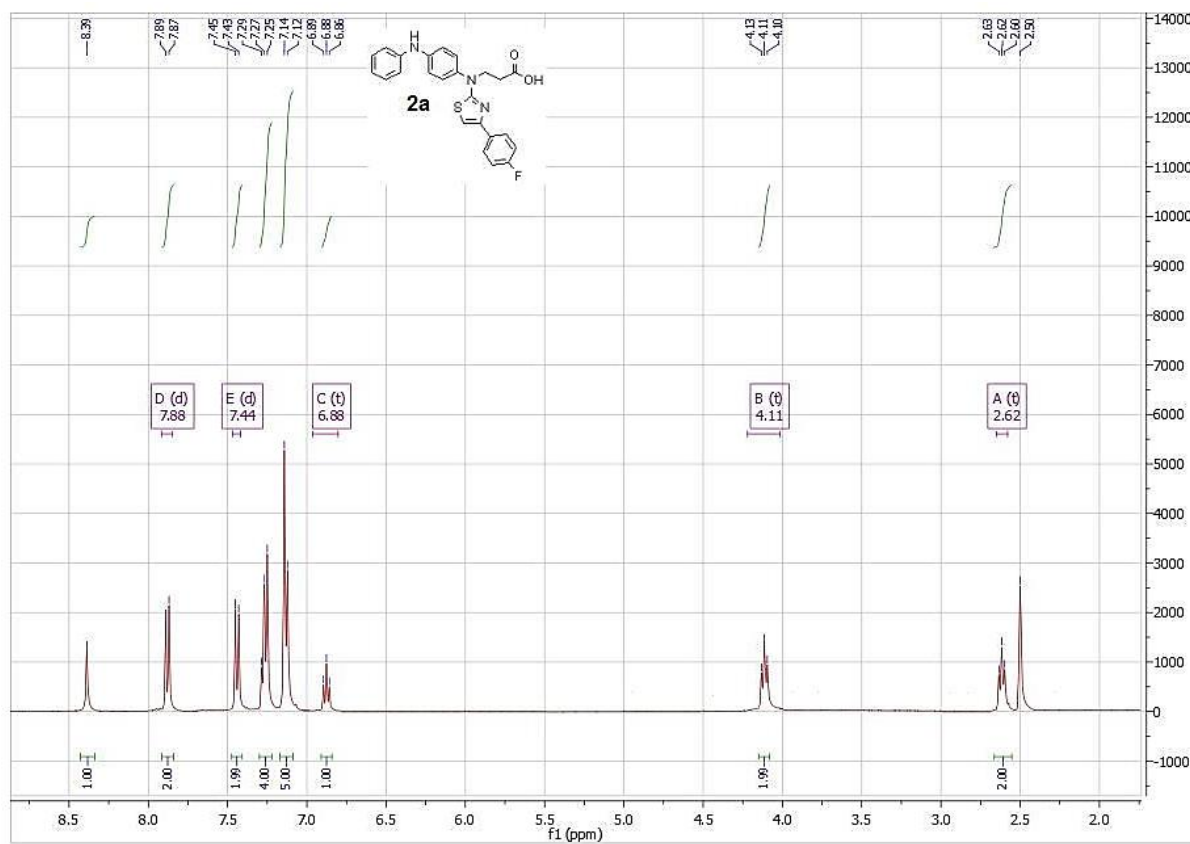

**Figure S4: <sup>13</sup>C NMR of compound 2a**

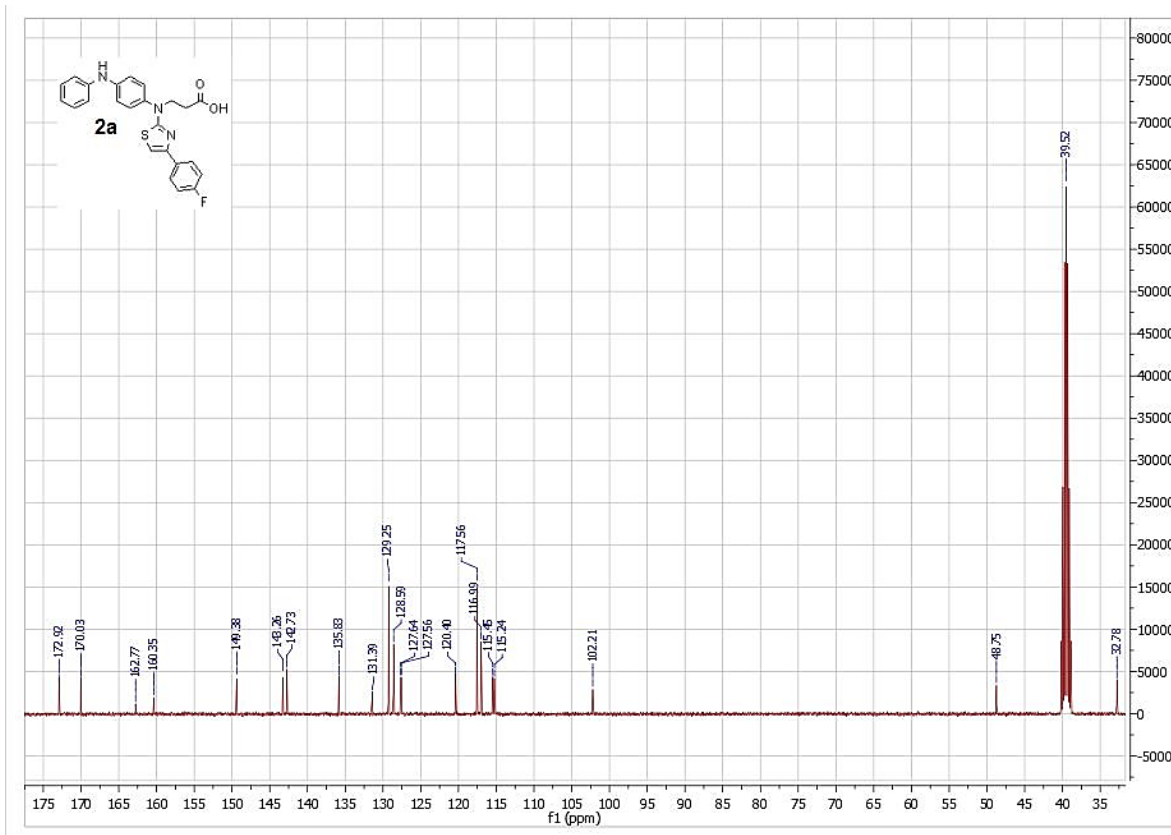

3-((4-(4-Chlorophenyl)thiazol-2-yl)(4-(phenylamino)phenyl)amino)propanoic acid (**2b**):  
**Figure S5:**  $^1\text{H}$  NMR of compound **2b**

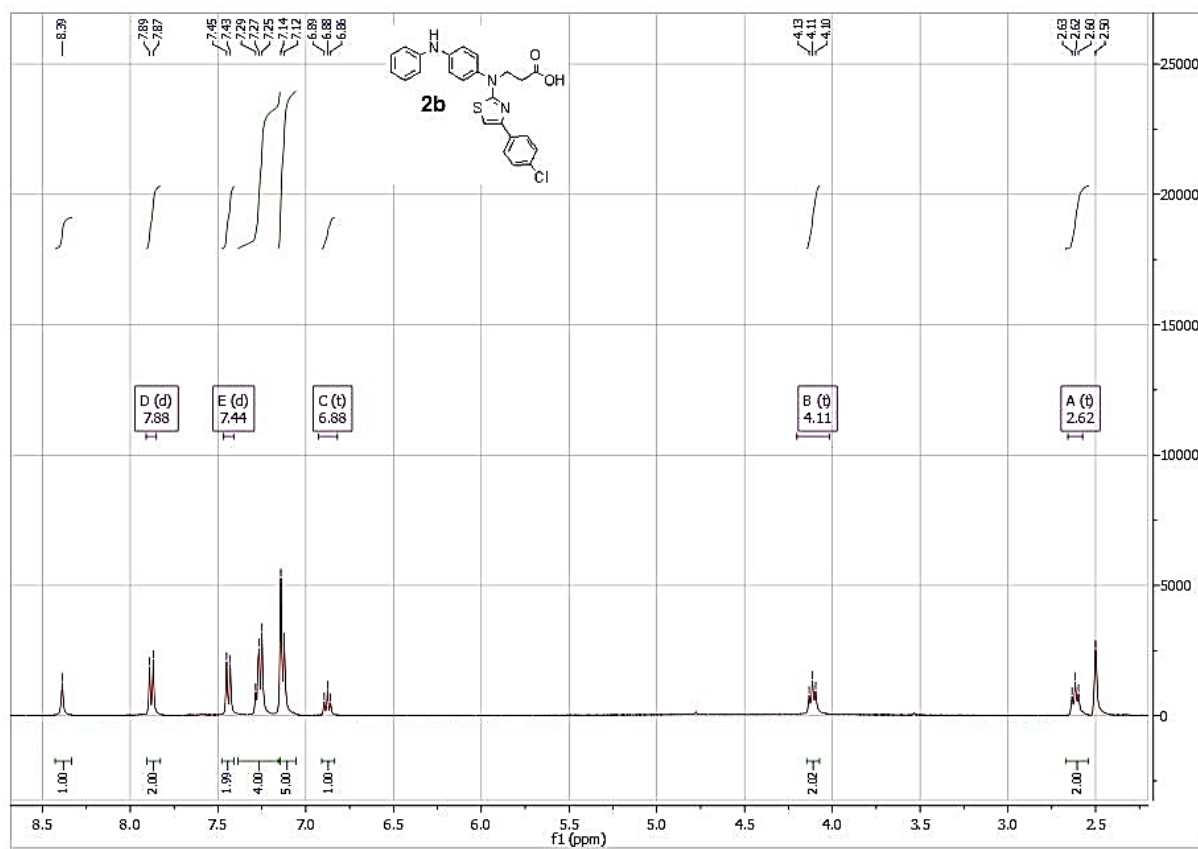

**Figure S6:**  $^{13}\text{C}$  NMR of compound **2b**

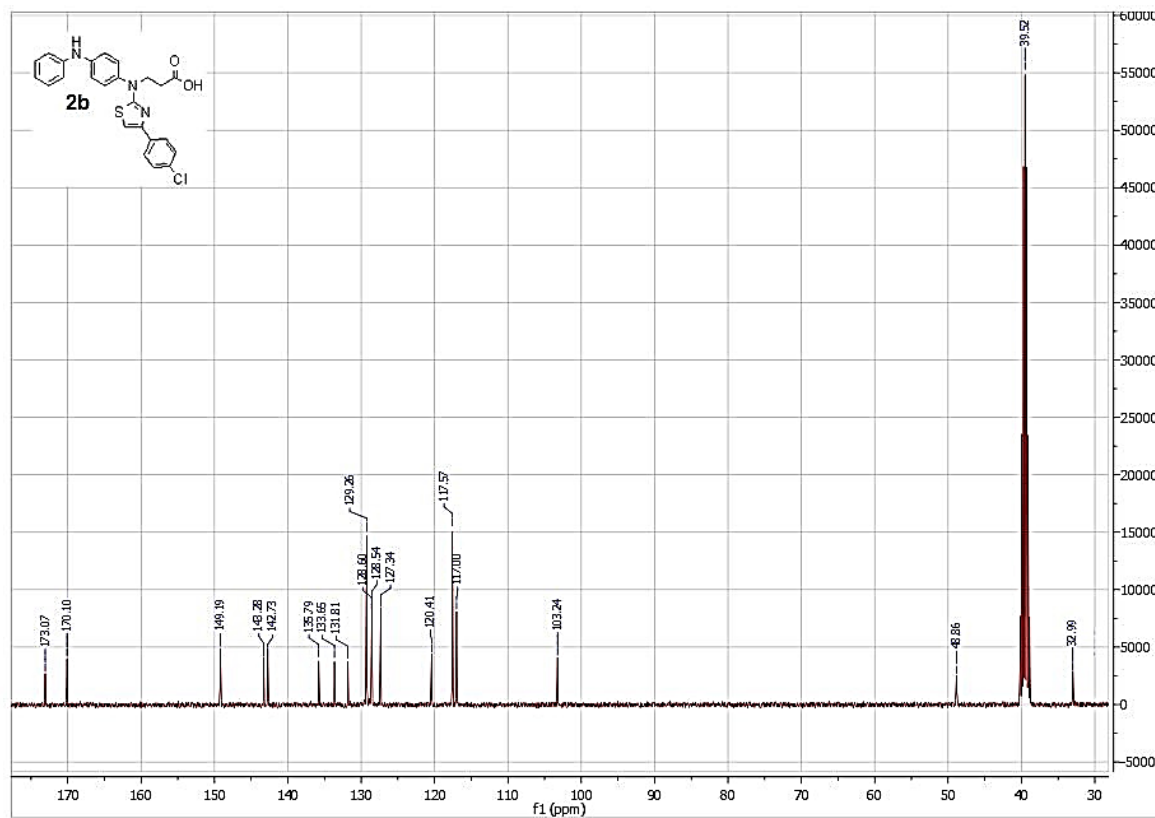

3-((4-(4-Bromophenyl)thiazol-2-yl)(4-(phenylamino)phenyl)amino)propanoic acid (**2c**):  
**Figure S7:**  $^1\text{H}$  NMR of compound **2c**

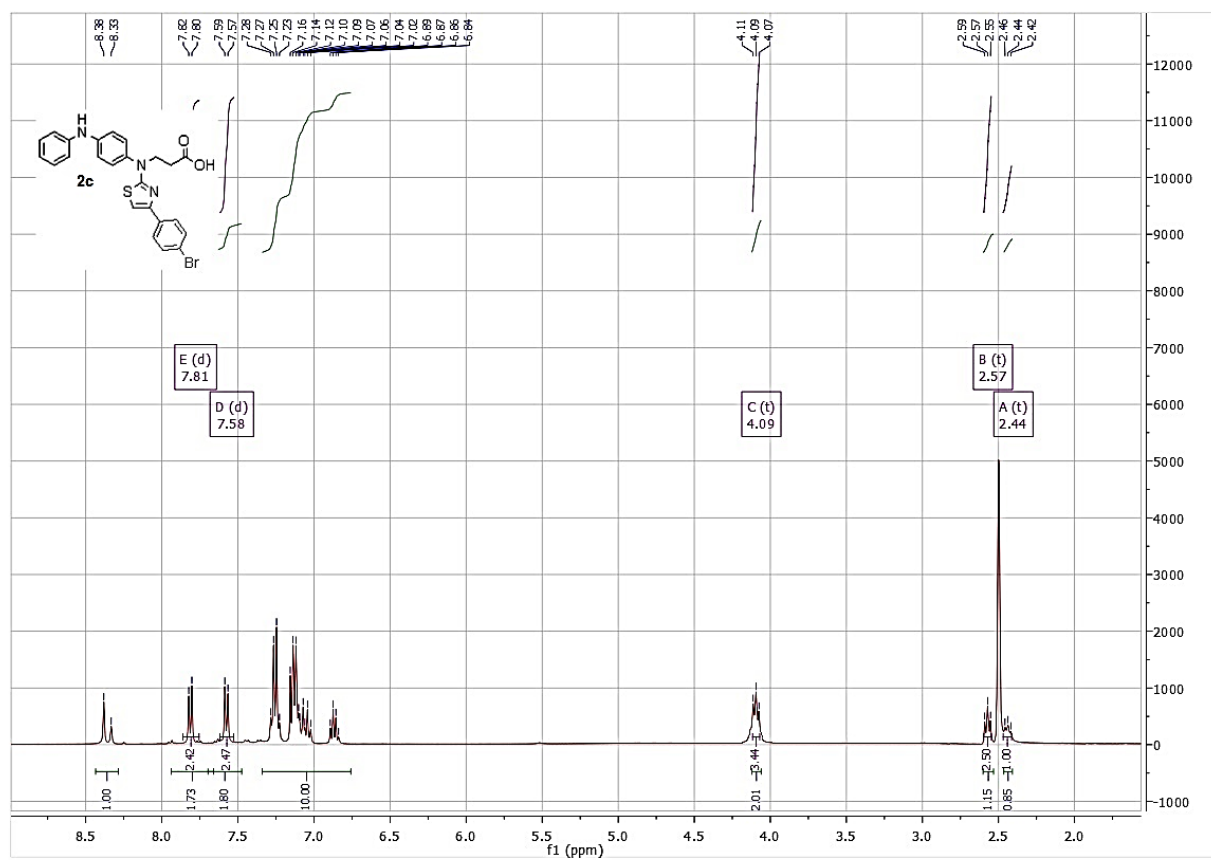

**Figure S8:**  $^{13}\text{C}$  NMR of compound **2c**

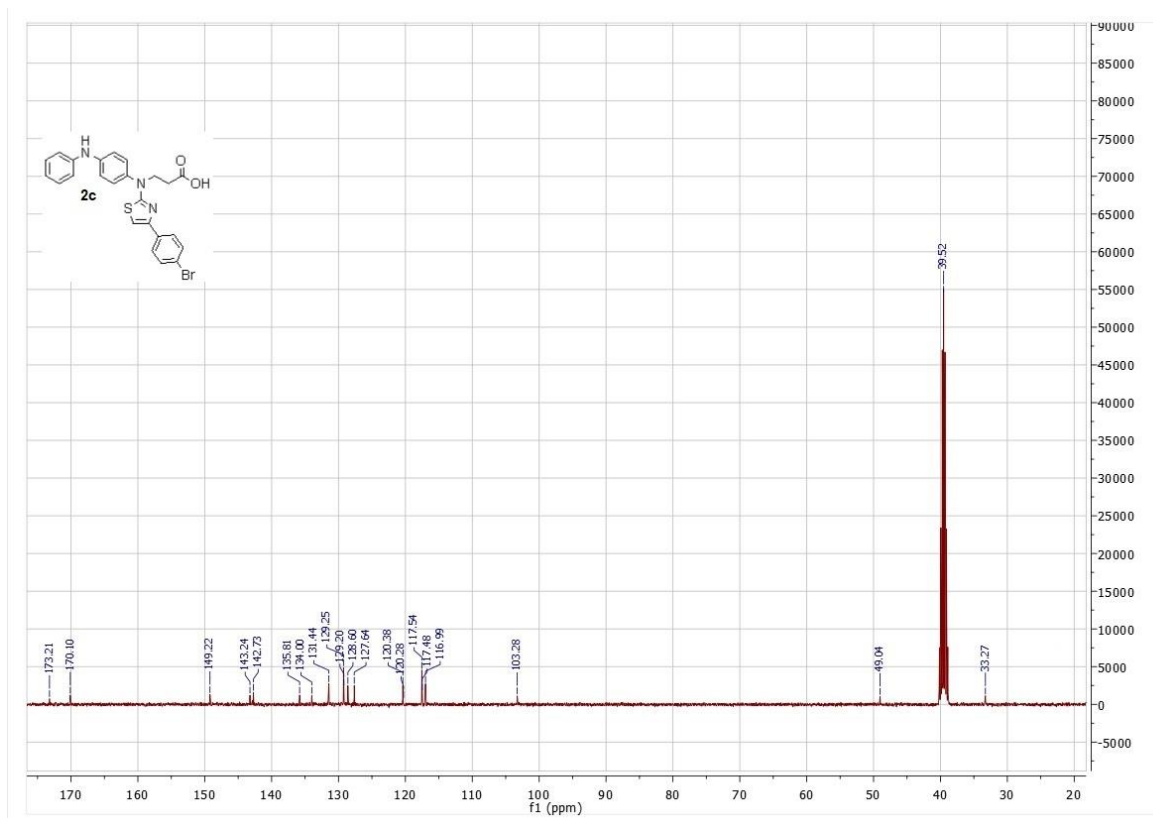

Methyl 3-((4-(4-chlorophenyl)thiazol-2-yl)(4-(phenylamino)phenyl)amino)propanoate (**3**)  
**Figure S9:**  $^1\text{H}$  NMR of compound **3**

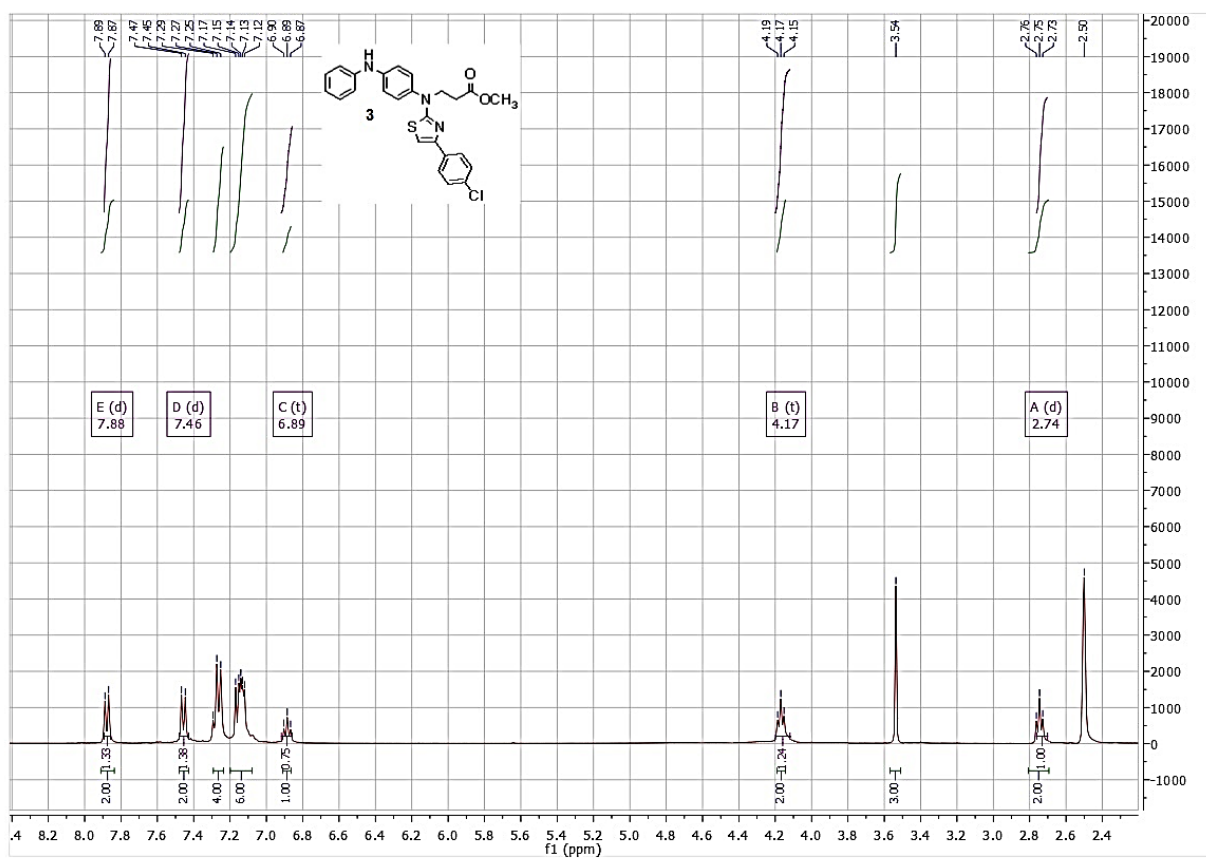

**Figure S10:**  $^{13}\text{C}$  NMR of compound **3**

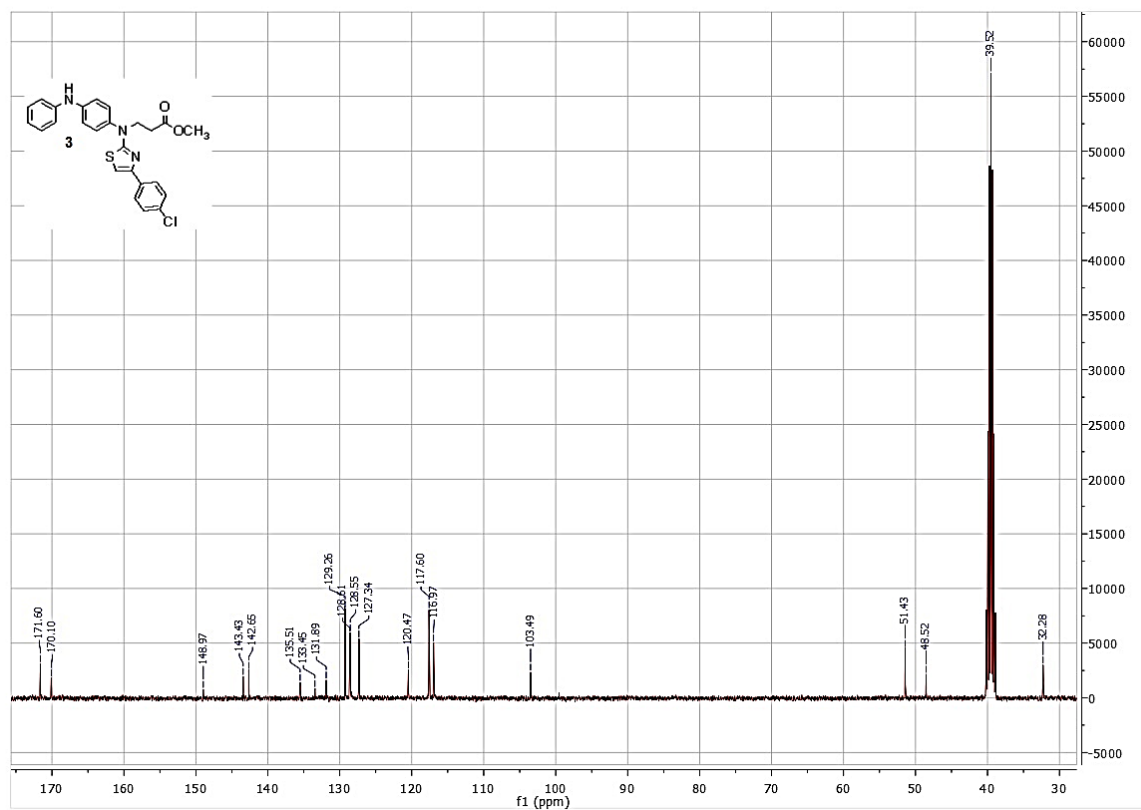

3-((4-(4-Chlorophenyl)thiazol-2-yl)(4-(phenylamino)phenyl)amino)propanehydrazide (**4**)  
**Figure S11:**  $^1\text{H}$  NMR of compound **4**

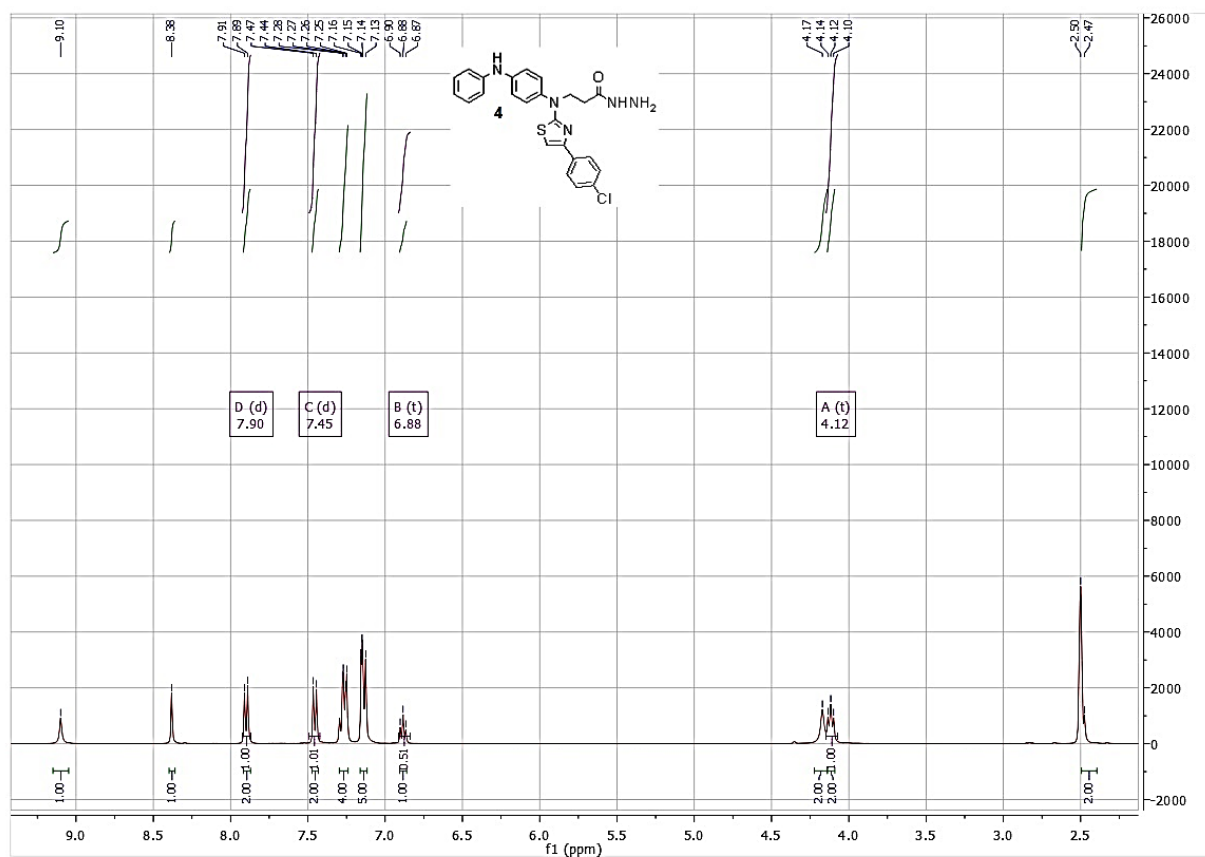

**Figure S12:**  $^{13}\text{C}$  NMR of compound **4**

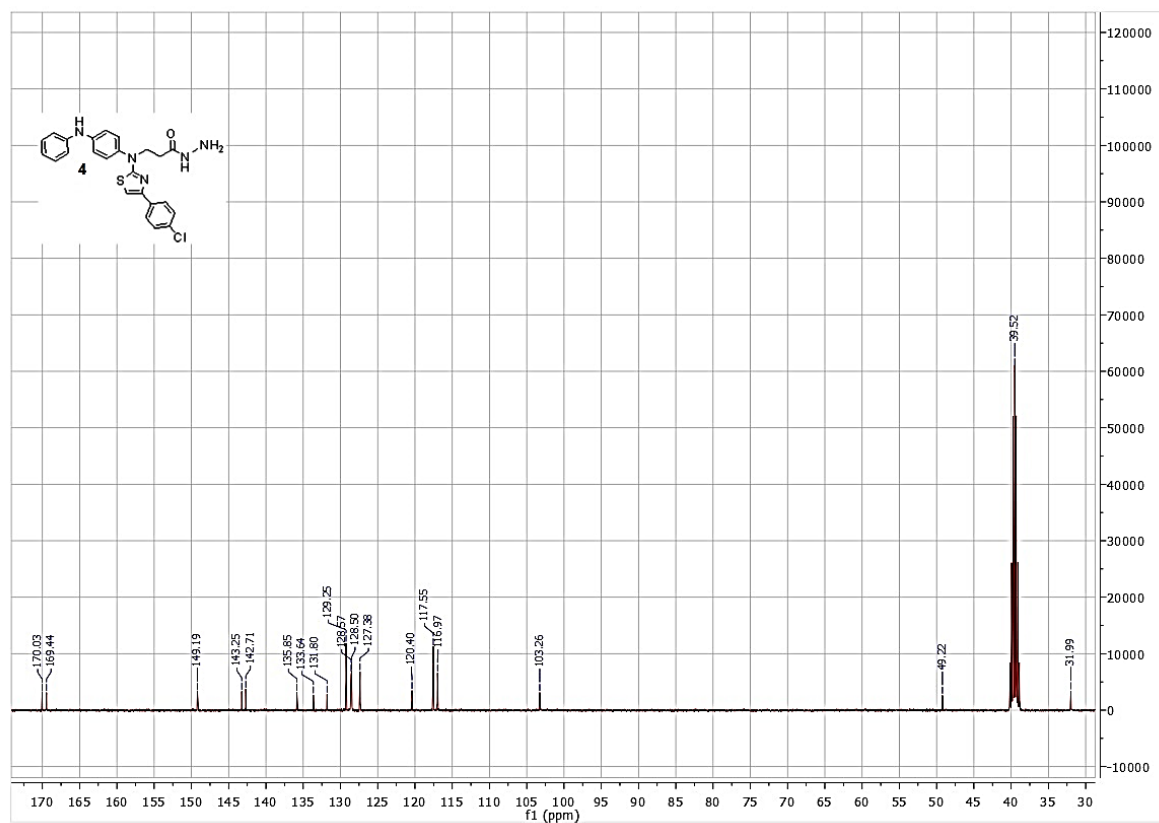

*N*-benzylidene-3-((4-(4-chlorophenyl)thiazol-2-yl)(4-(phenylamino)phenyl)amino)propanehydrazide (**5a**)

**Figure S13:**  $^1\text{H}$  NMR of compound **5a**

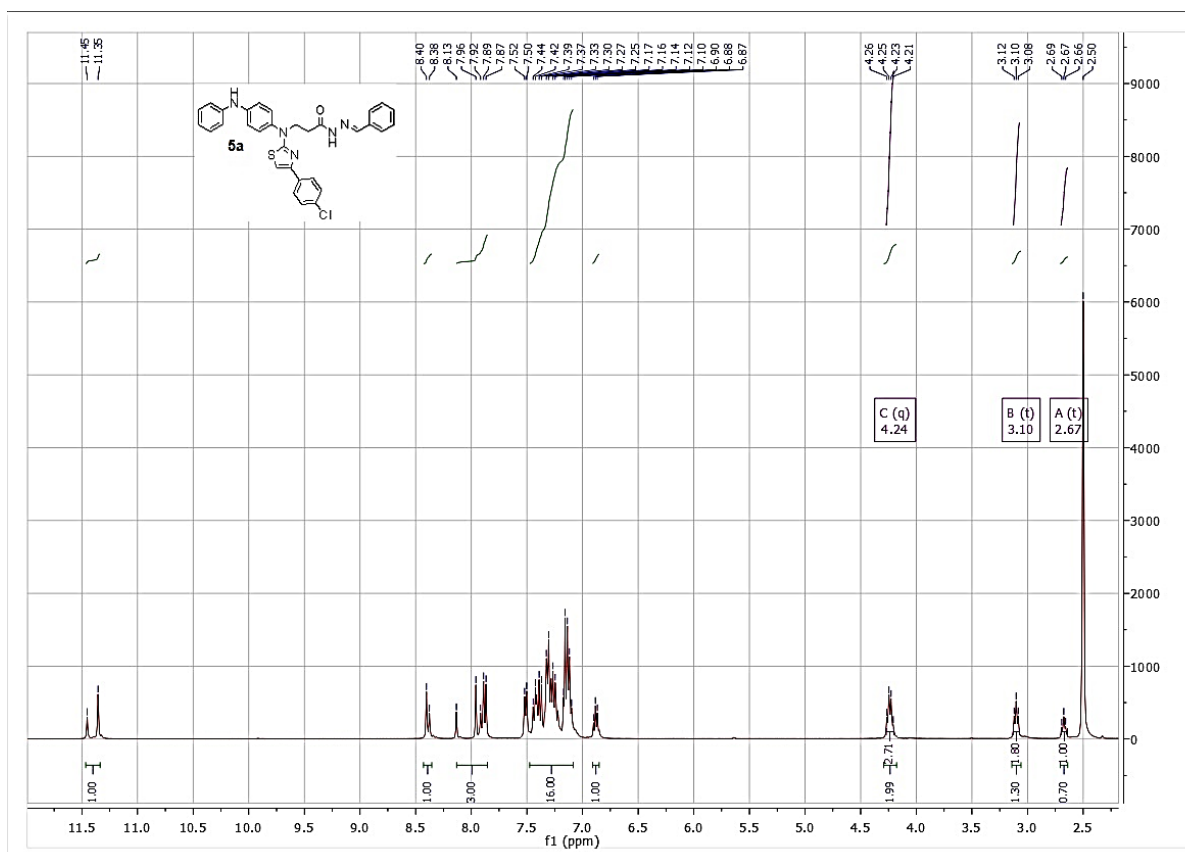

**Figure S14:**  $^{13}\text{C}$  NMR of compound **5a**

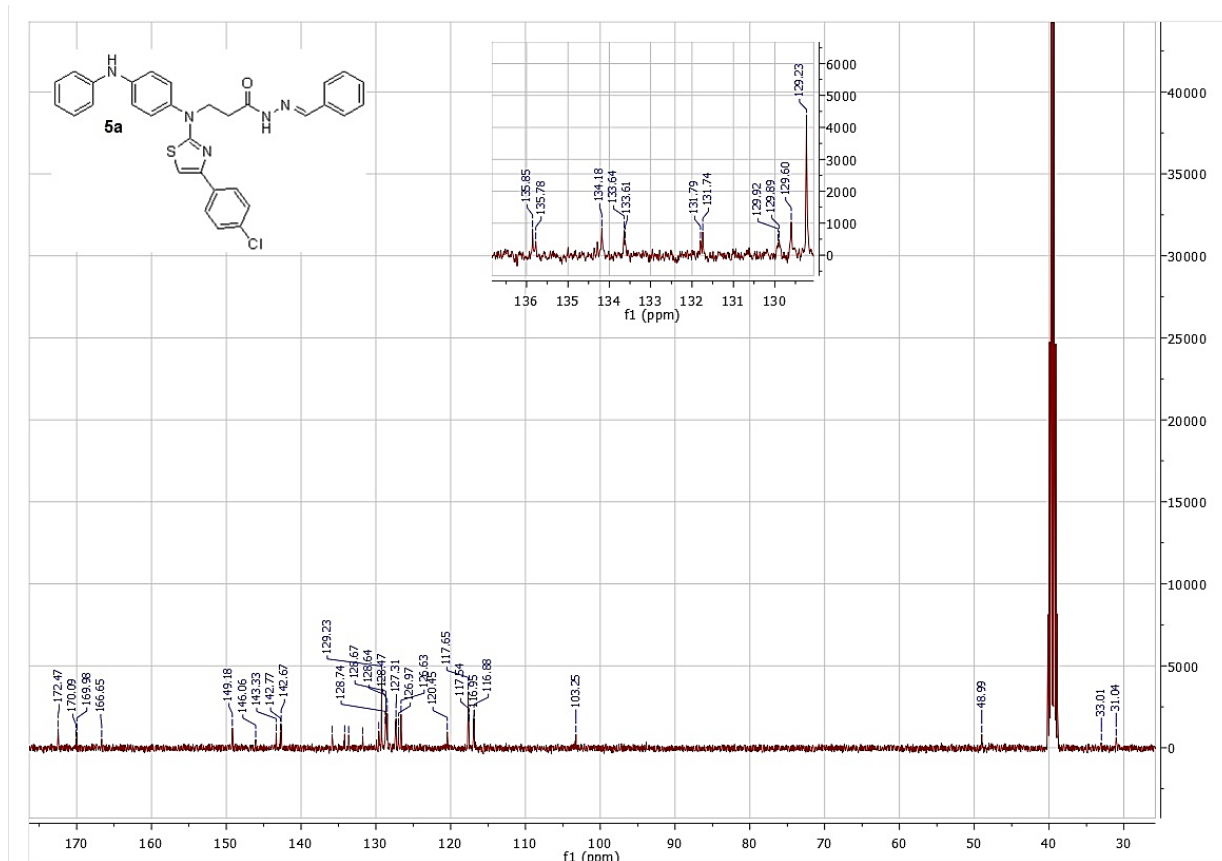



3-((4-(4-Chlorophenyl)thiazol-2-yl)(4-(phenylamino)phenyl)amino)-N'-(4-fluorobenzylidene)propanehydrazide (**5b**)  
**Figure S15:**  $^1\text{H}$  NMR of compound **5b**

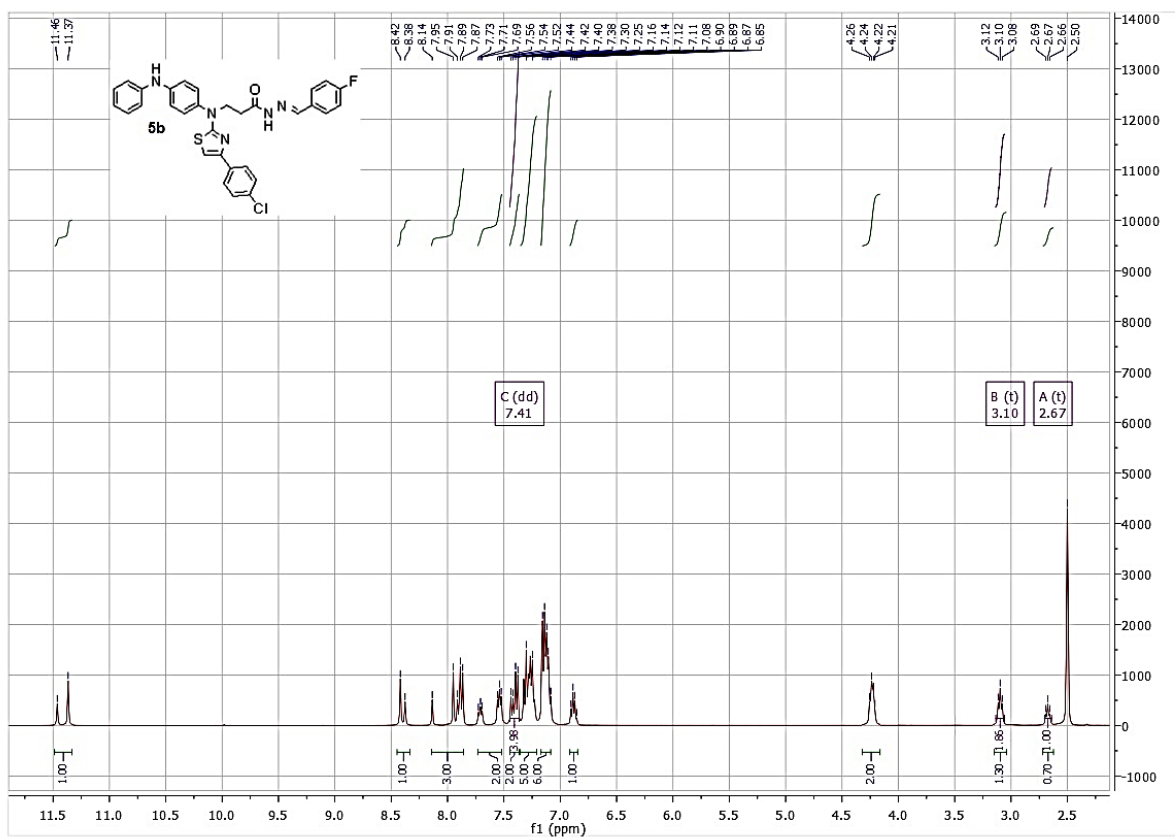

**Figure S16:**  $^{13}\text{C}$  NMR of compound **5b**

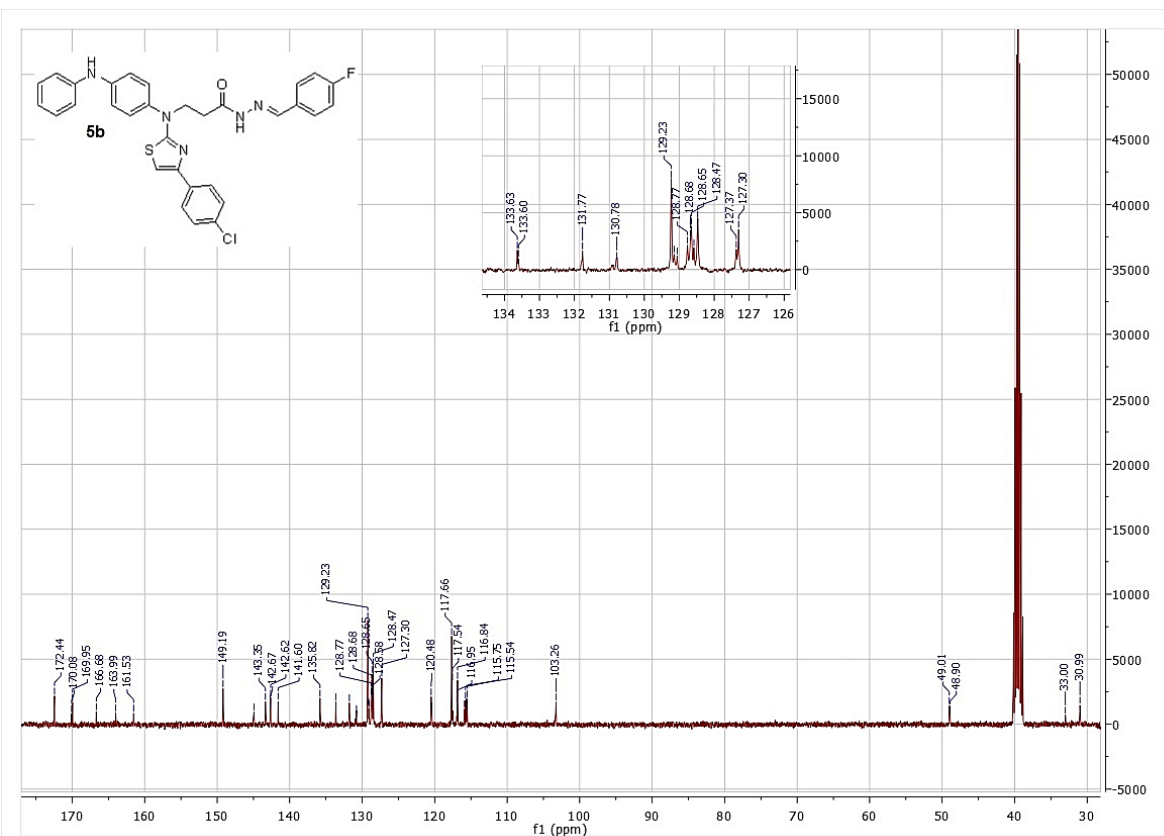

3-((4-(4-Chlorophenyl)thiazol-2-yl)(4-(phenylamino)phenyl)amino)-N'-(4-chlorobenzylidene)propanehydrazide (**5c**)  
**Figure S17:**  $^1\text{H}$  NMR of compound **5c**

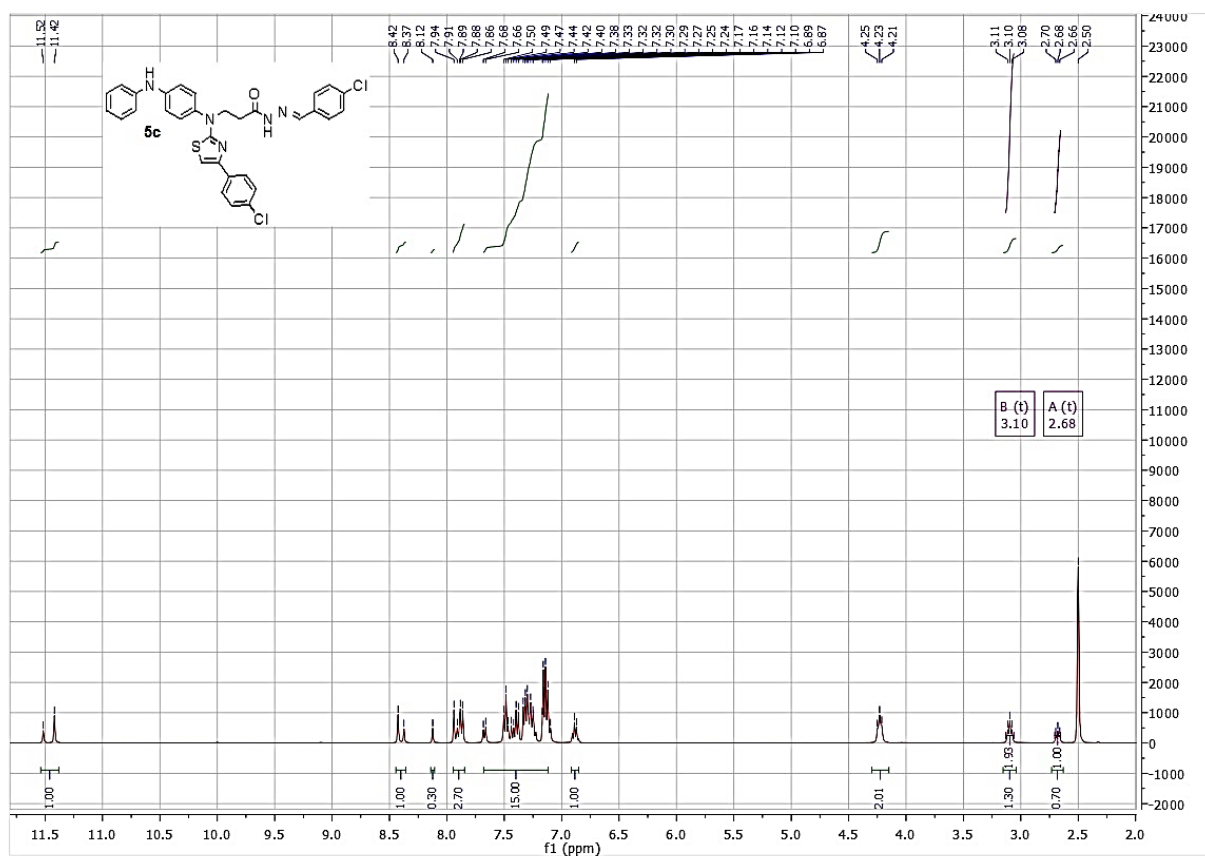

**Figure S18:**  $^{13}\text{C}$  NMR of compound **5c**

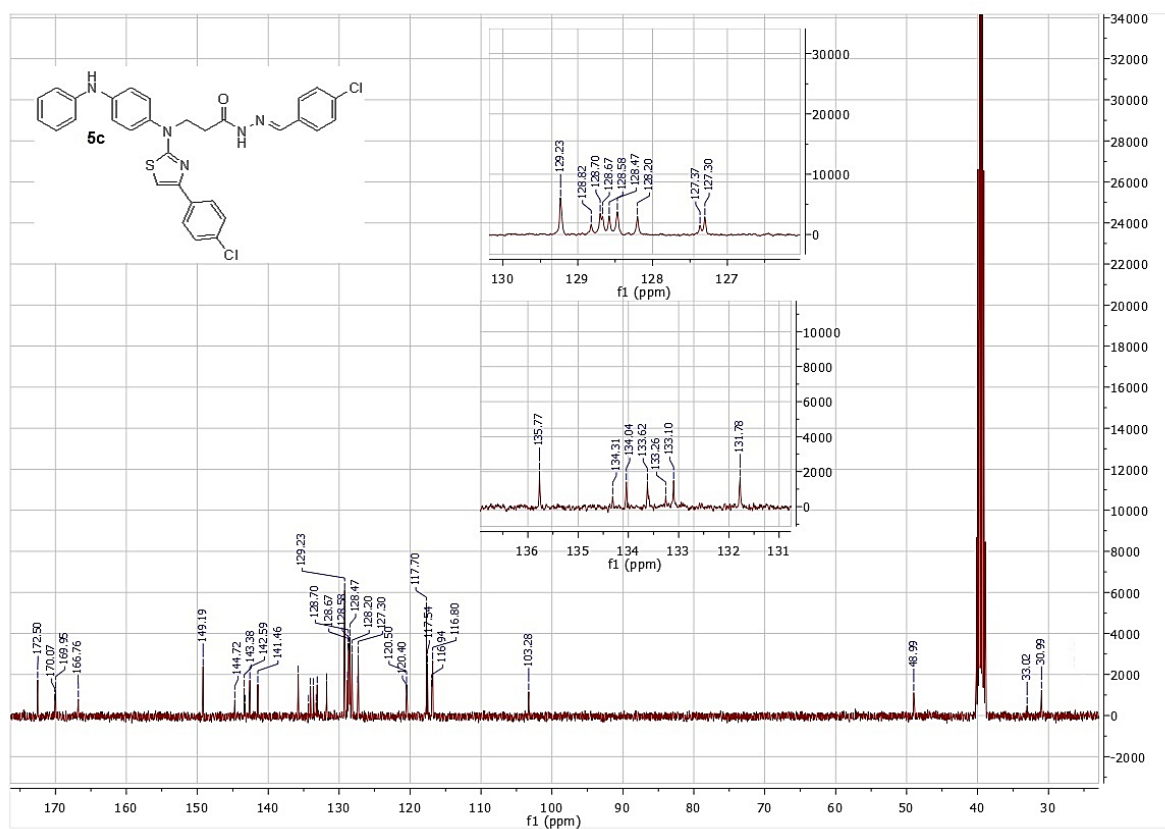

**Figure S19:**  $^1\text{H}$  NMR of compound **5d**

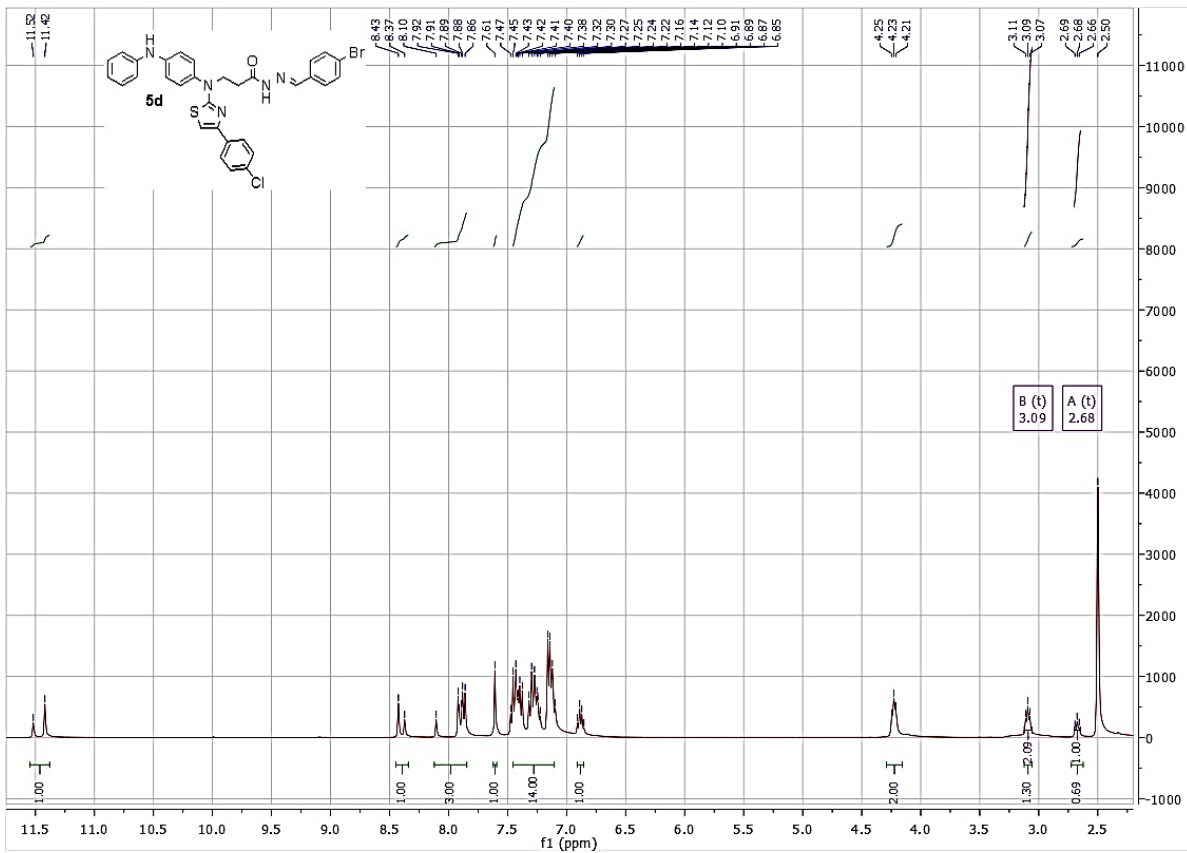

**Figure S20:**  $^{13}\text{C}$  NMR of compound **5d**

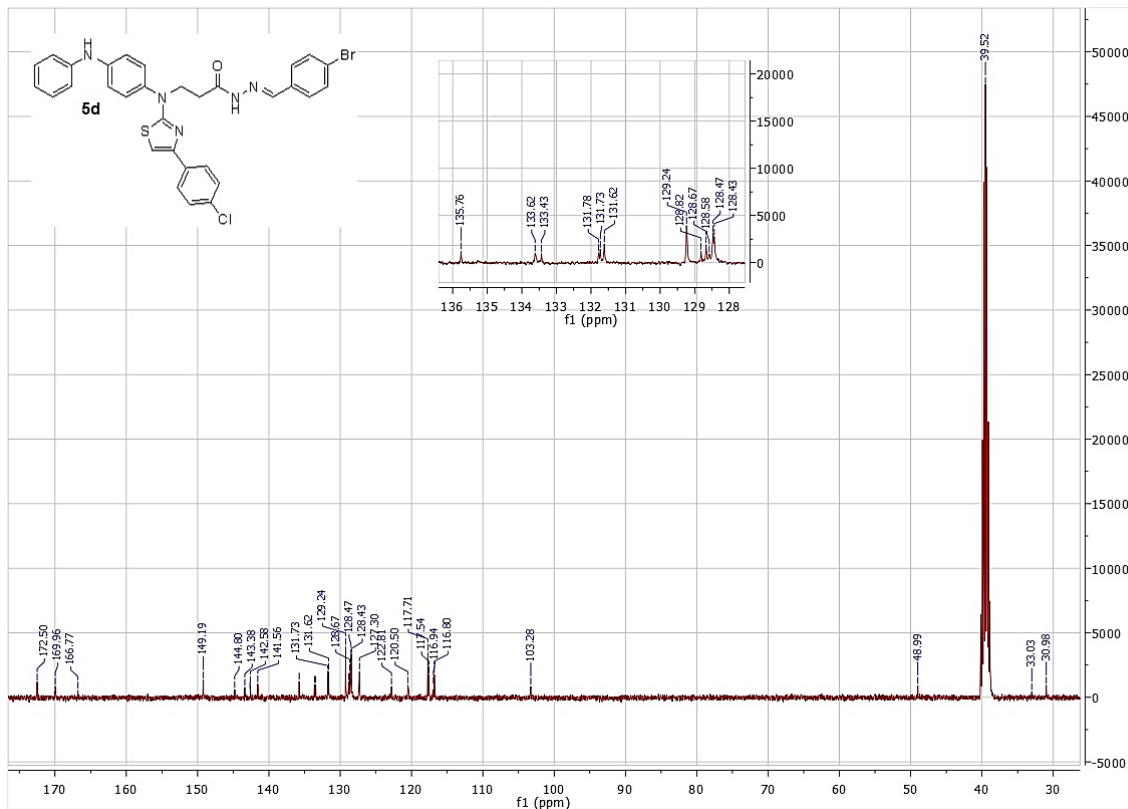

3-((4-(4-chlorophenyl)thiazol-2-yl)-N'-(4-nitrobenzylidene)-(4-(phenylamino)phenyl)amino)propanehydrazide (**5e**)  
**Figure S21:**  $^1\text{H}$  NMR of compound **5e**

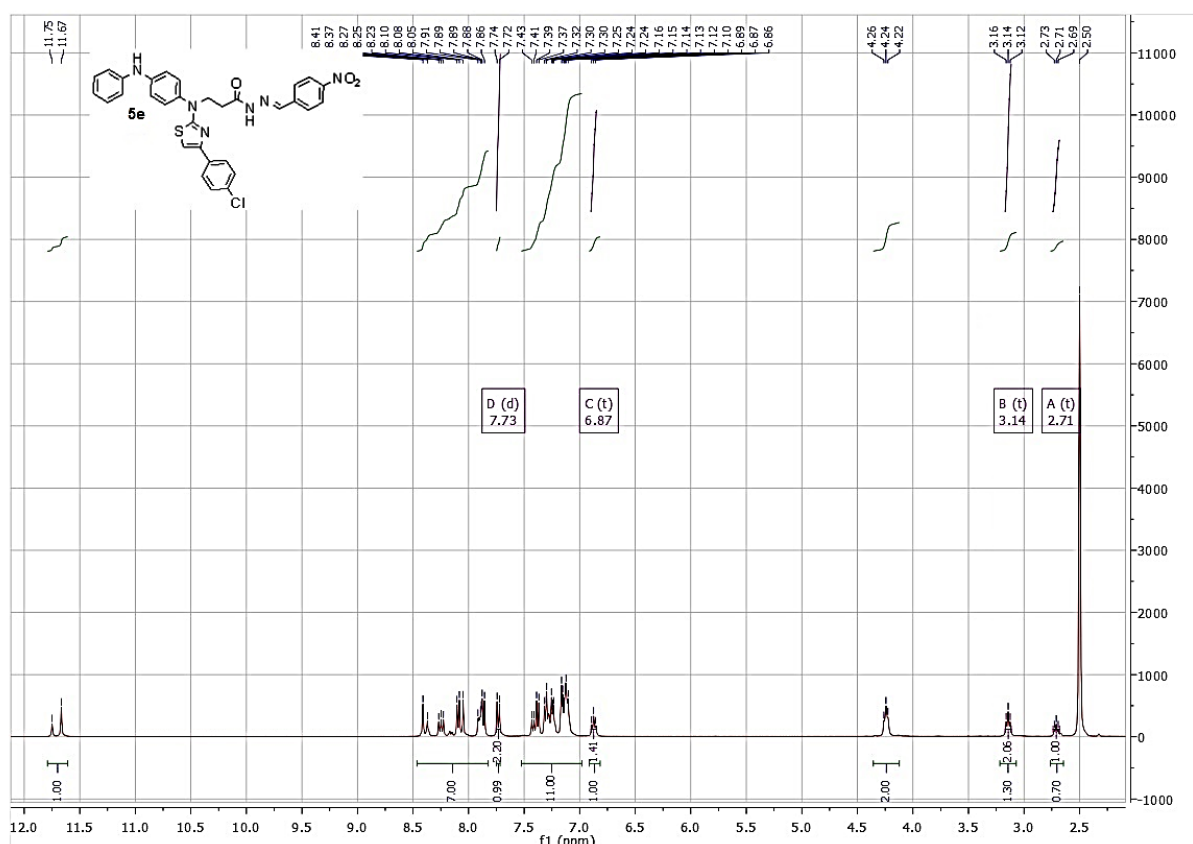

**Figure S22:**  $^{13}\text{C}$  NMR of compound **5e**

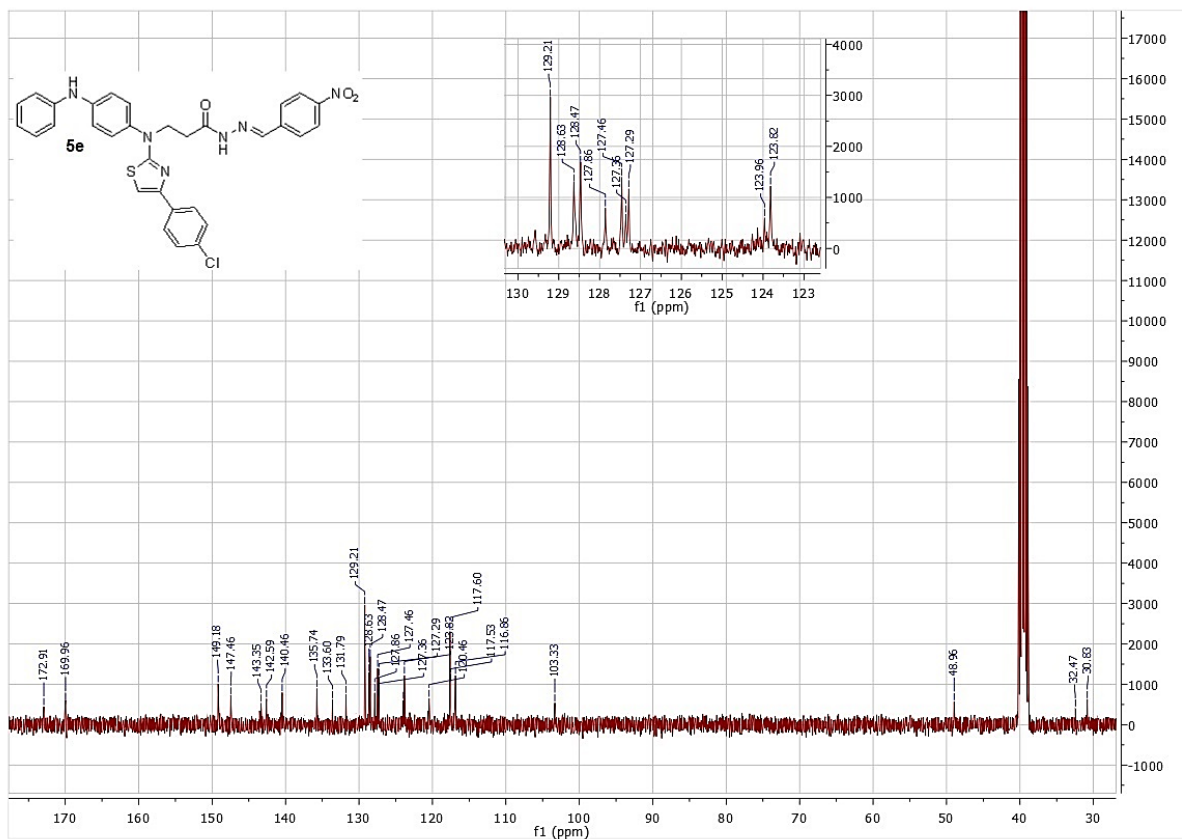

**Figure S23:** <sup>1</sup>H NMR of compound **5f**

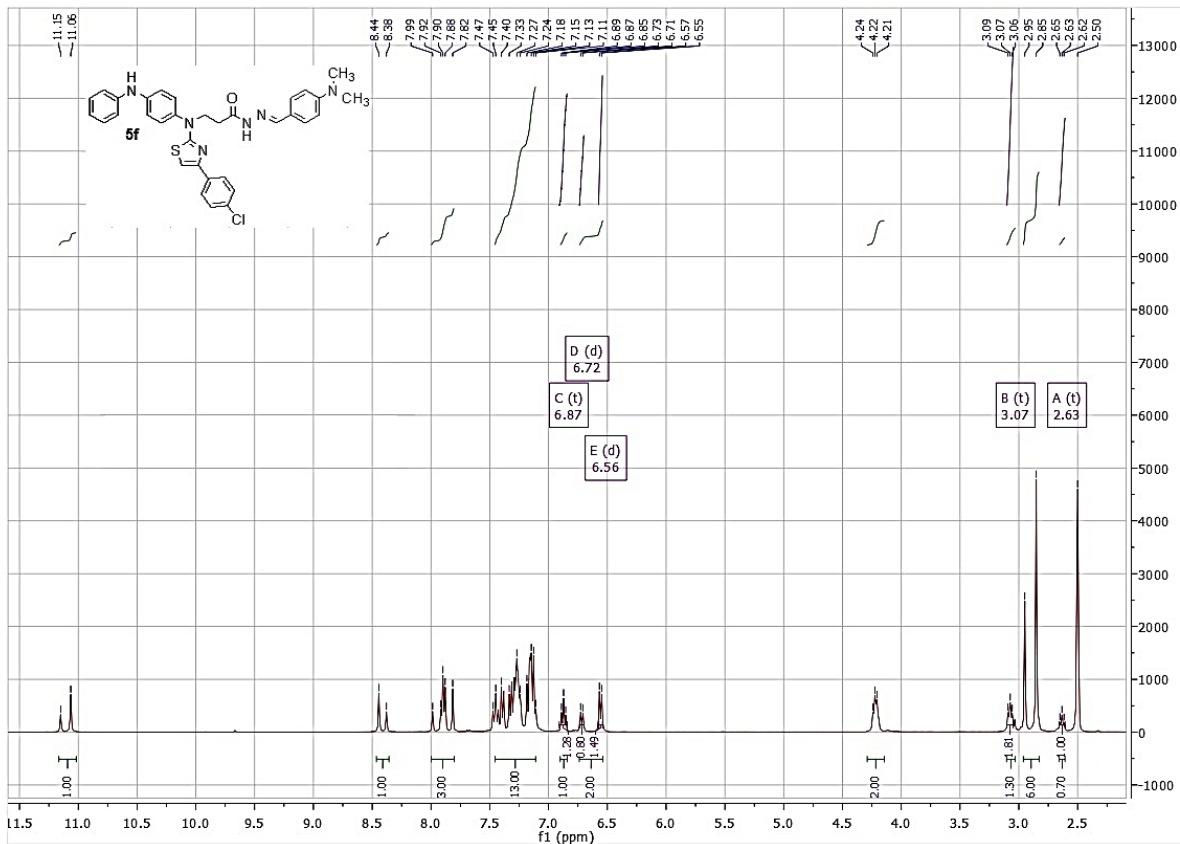

**Figure S24:**  $^{13}\text{C}$  NMR of compound **5f**

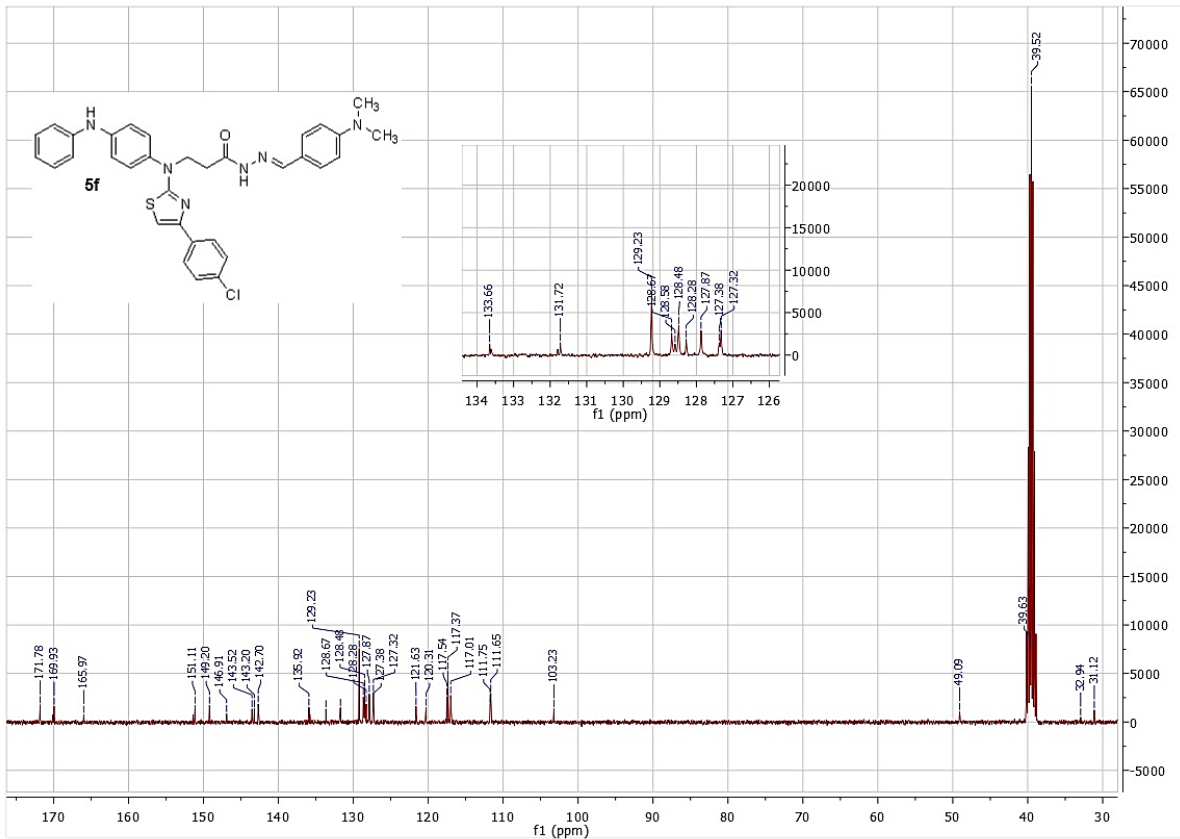

3-((4-(4-chlorophenyl)thiazol-2-yl)-N'-(4-methylbenzylidene)-(4-(phenylamino)phenyl)amino)propanehydrazide (**5g**)

**Figure S25:** <sup>1</sup>H NMR of compound **5g**

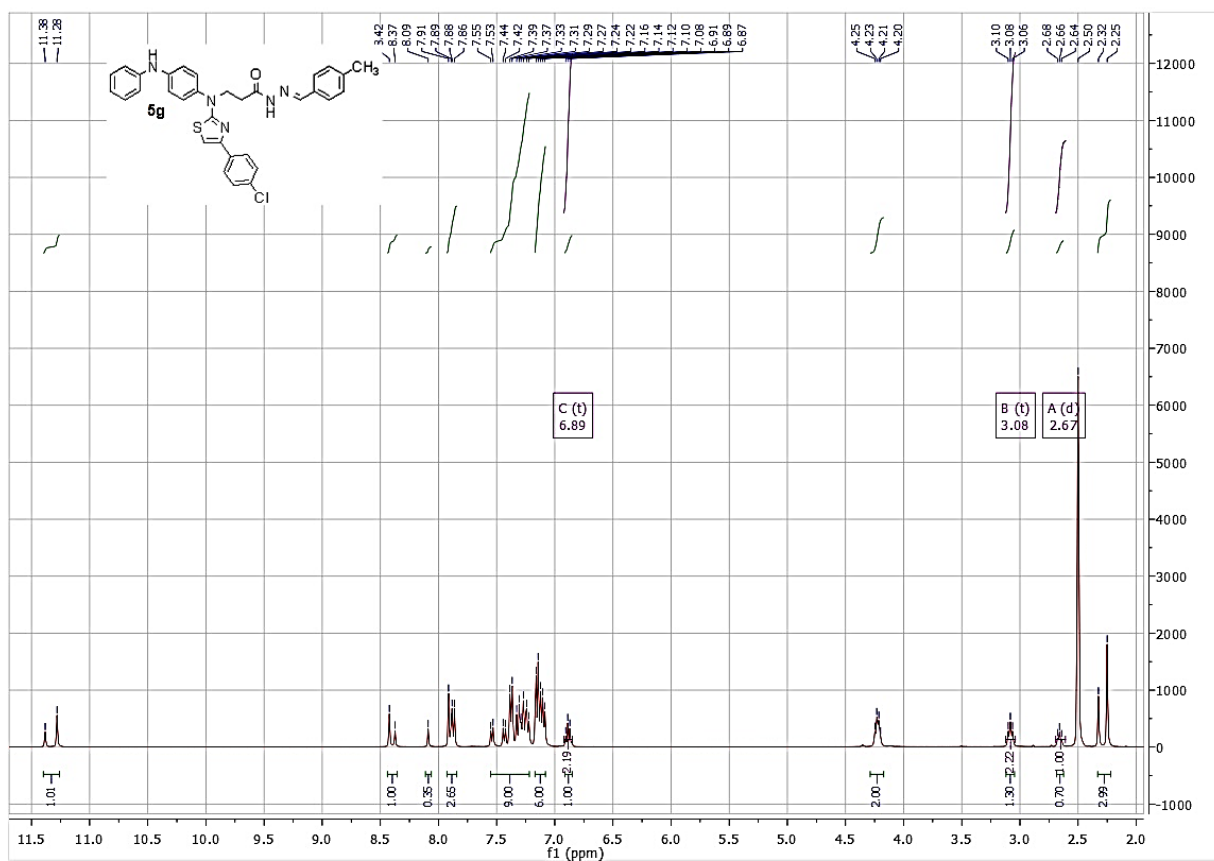

**Figure S26:** <sup>13</sup>C NMR of compound **5g**

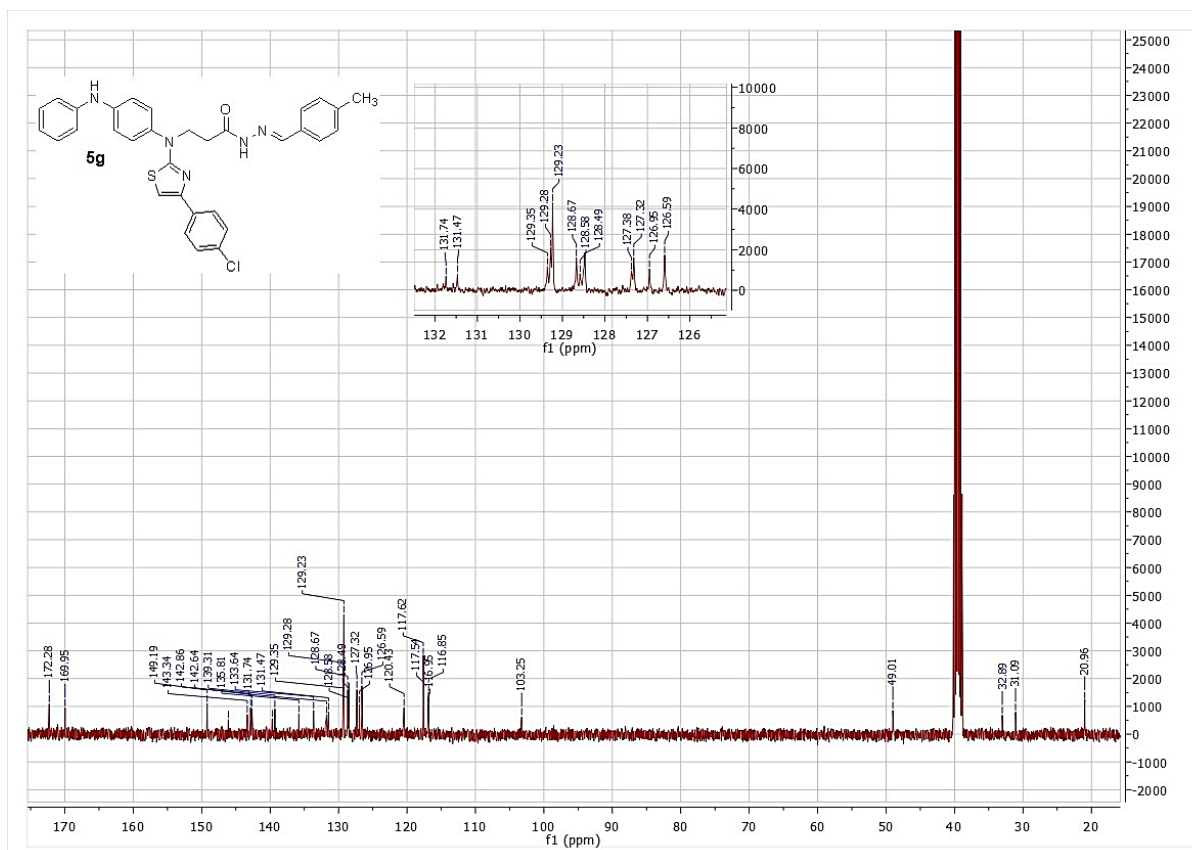



3-((4-(4-chlorophenyl)thiazol-2-yl)(4-(phenylamino)phenyl)amino)-N'-(thiophen-2-ylmethylene)propanehydrazide (**5h**)

**Figure S27:** <sup>1</sup>H NMR of compound **5h**

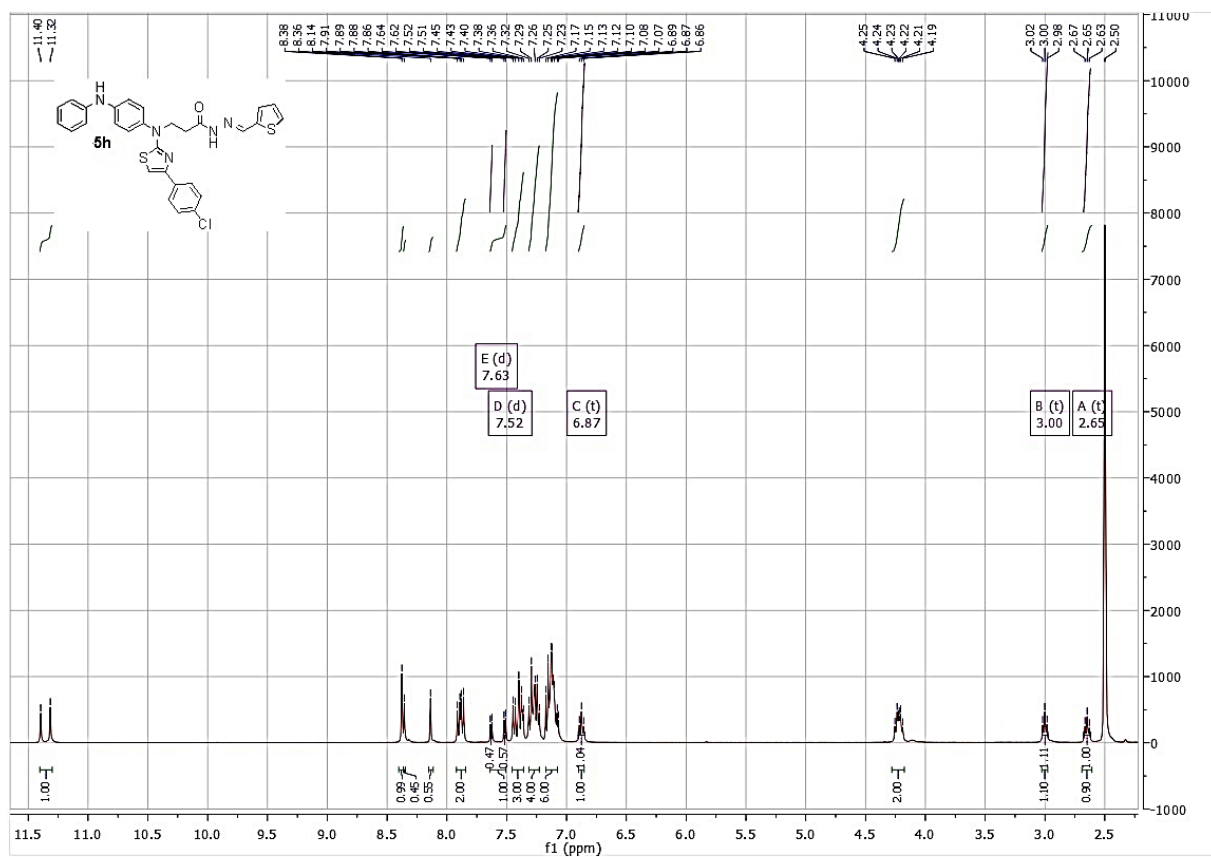

**Figure S28:** <sup>13</sup>C NMR of compound **5h**

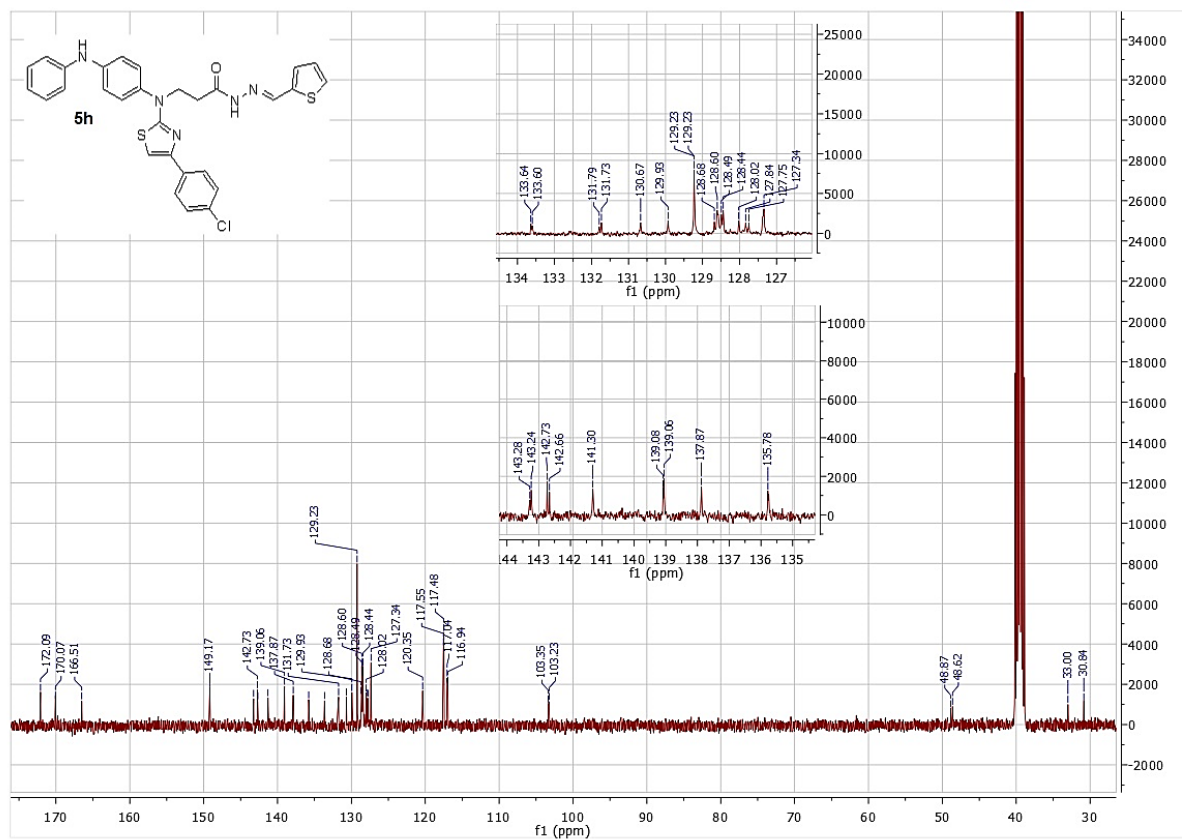

3-((4-(4-chlorophenyl)thiazol-2-yl)(4-(phenylamino)phenyl)amino)-N'-((5-nitrothiophen-2-yl)methylene)propanehydrazide (**5i**)  
**Figure S29:**  $^1\text{H}$  NMR of compound **5i**

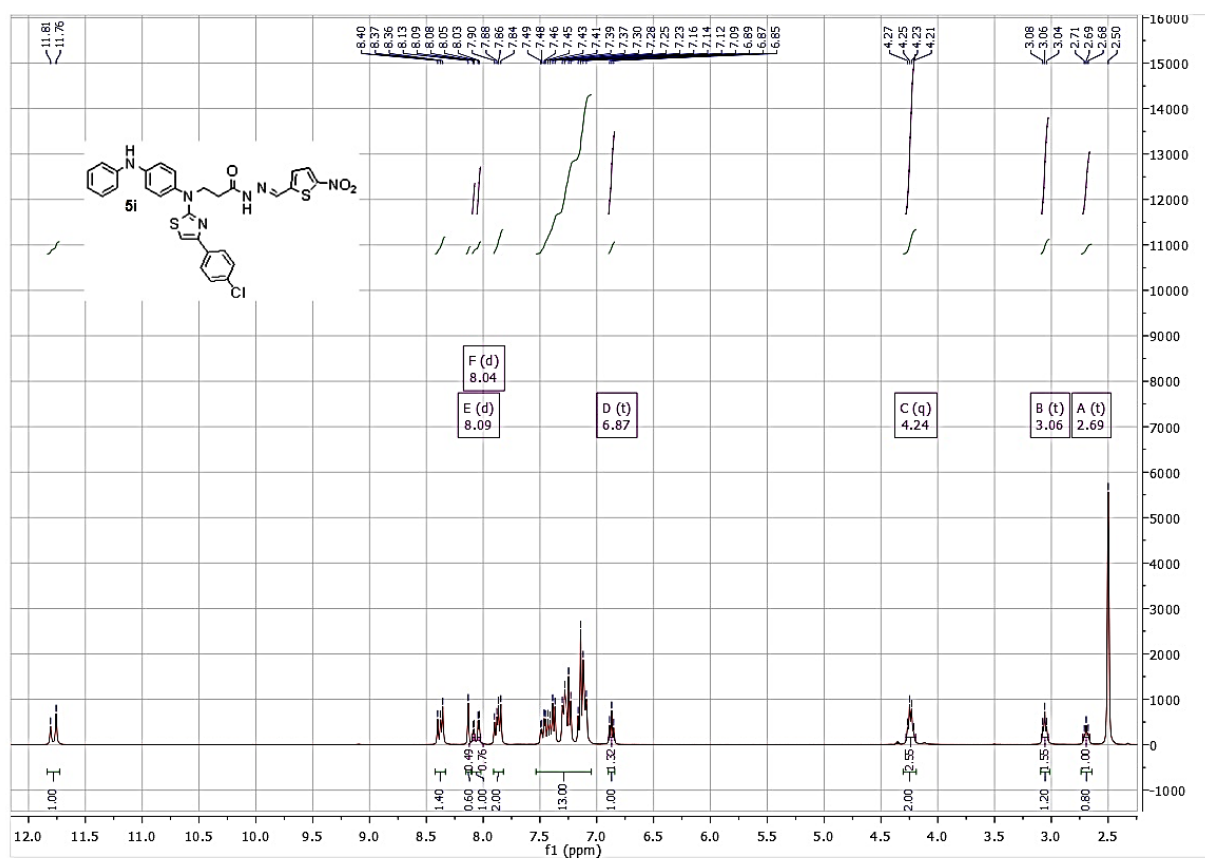

**Figure S30:**  $^{13}\text{C}$  NMR of compound **5i**

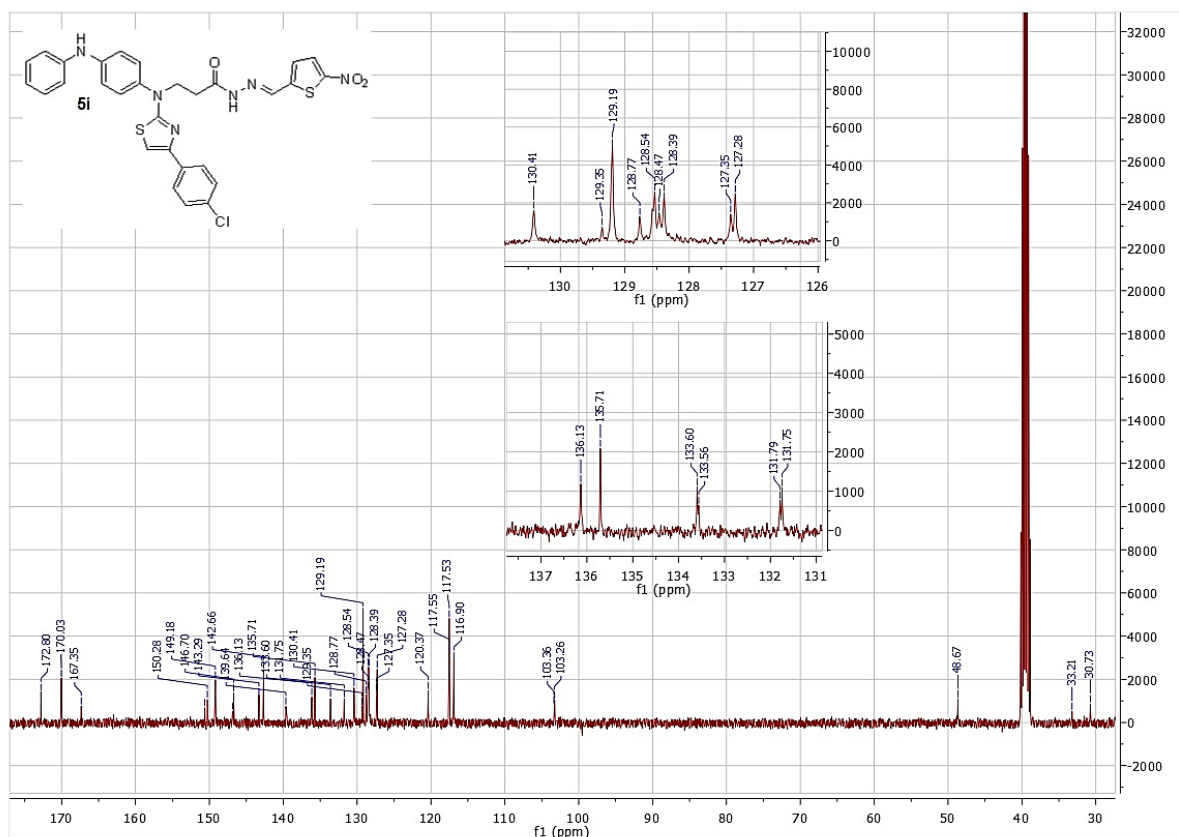



3-((4-(4-chlorophenyl)thiazol-2-yl)(4-(phenylamino)phenyl)amino)-N'-(propan-2-ylidene)propanehydrazide (**5j**)  
**Figure S31**  $^1\text{H}$  NMR of compound **5j**

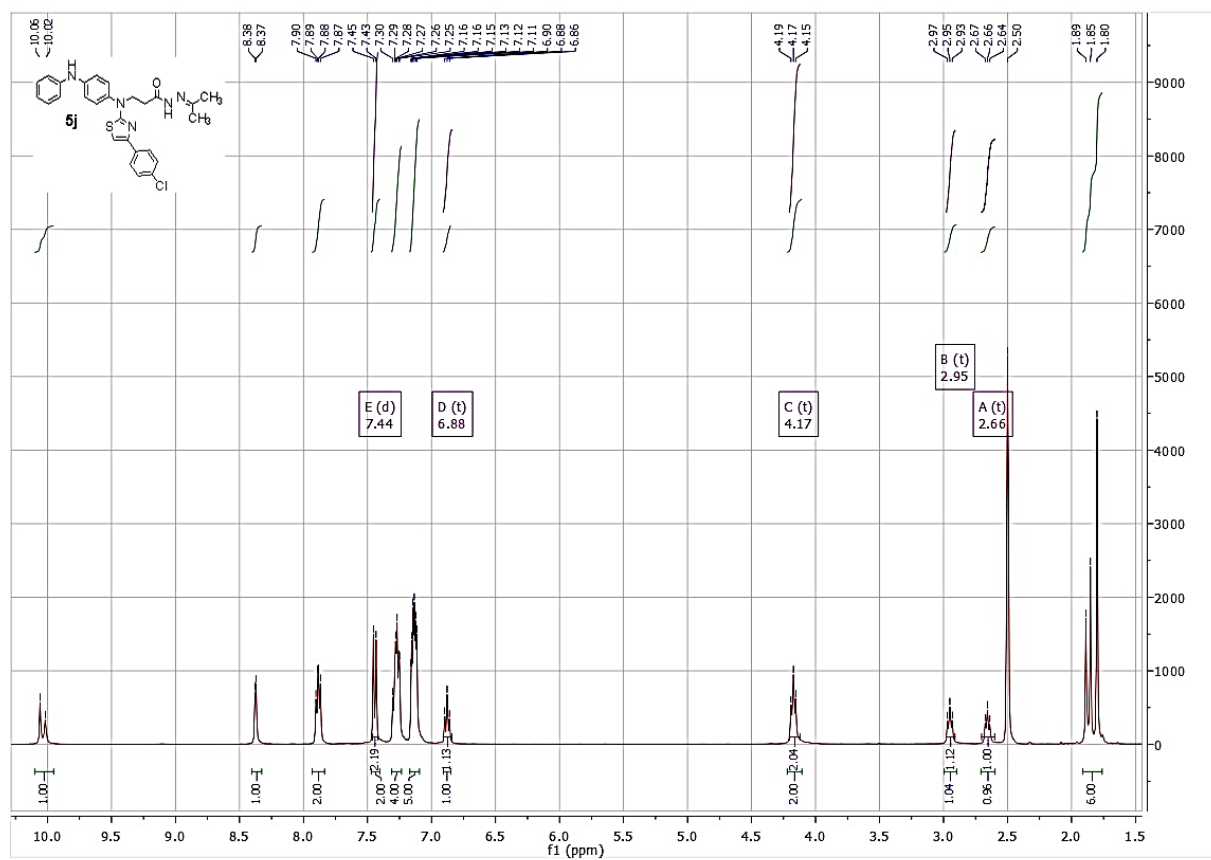

**Figure S32:**  $^{13}\text{C}$  NMR of compound **5j**

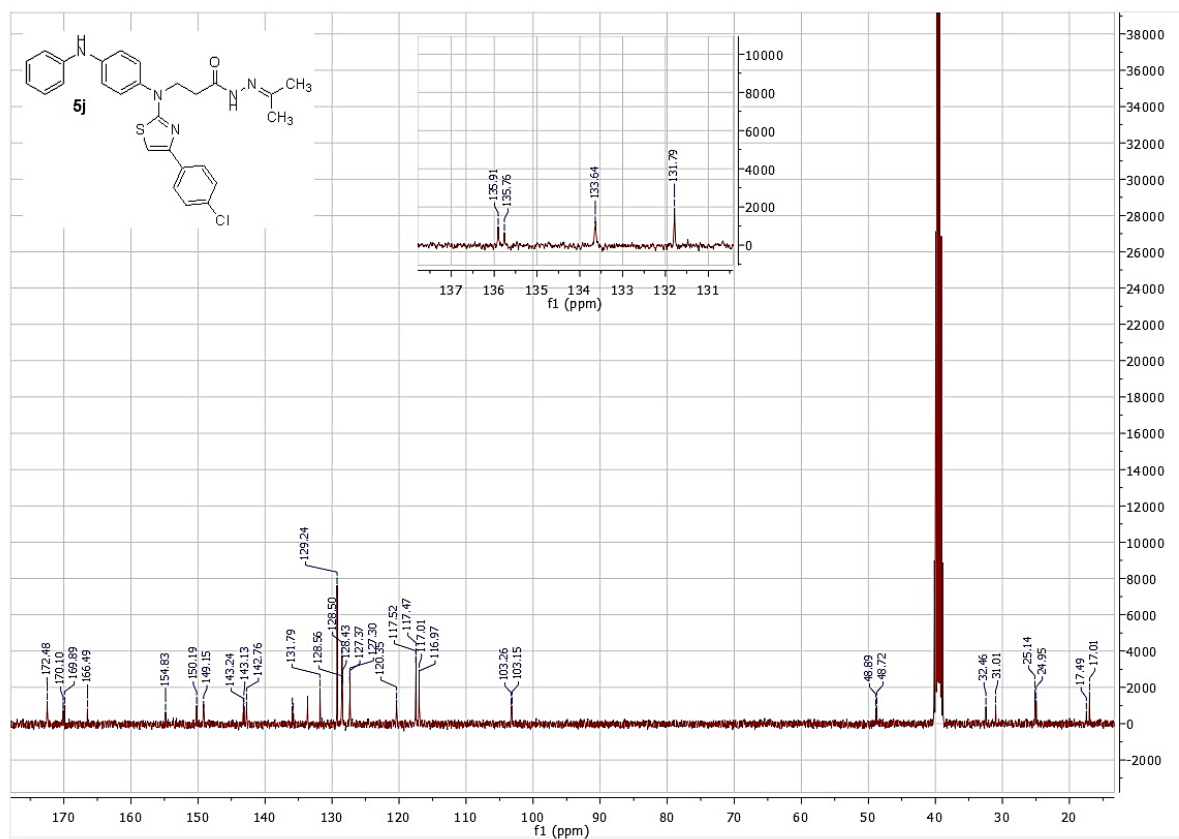

*N'*-(butan-2-ylidene)-3-((4-(4-chlorophenyl)thiazol-2-yl)(4-(phenylamino)phenyl)amino)propanehydrazide (**5k**)  
**Figure S33:** <sup>1</sup>H NMR of compound **5k**

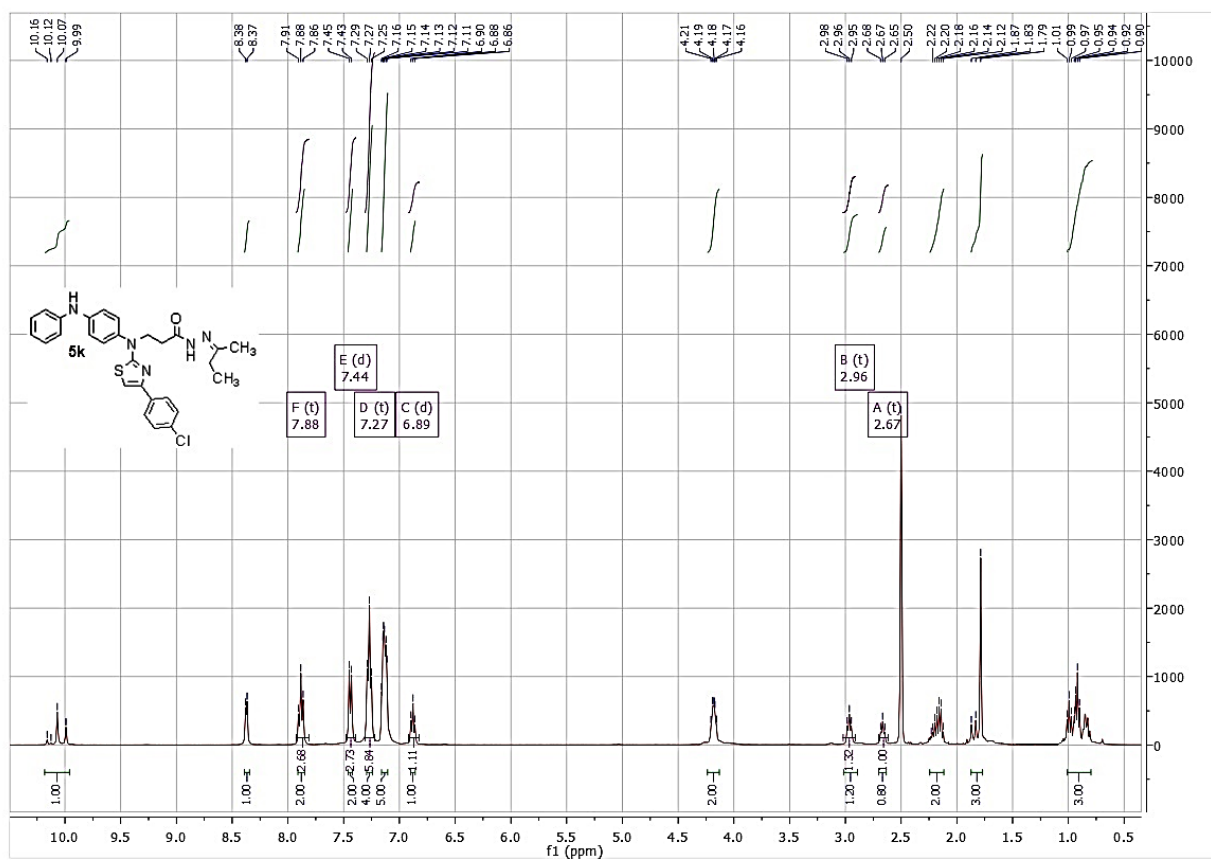

**Figure S34:** <sup>13</sup>C NMR of compound **5k**

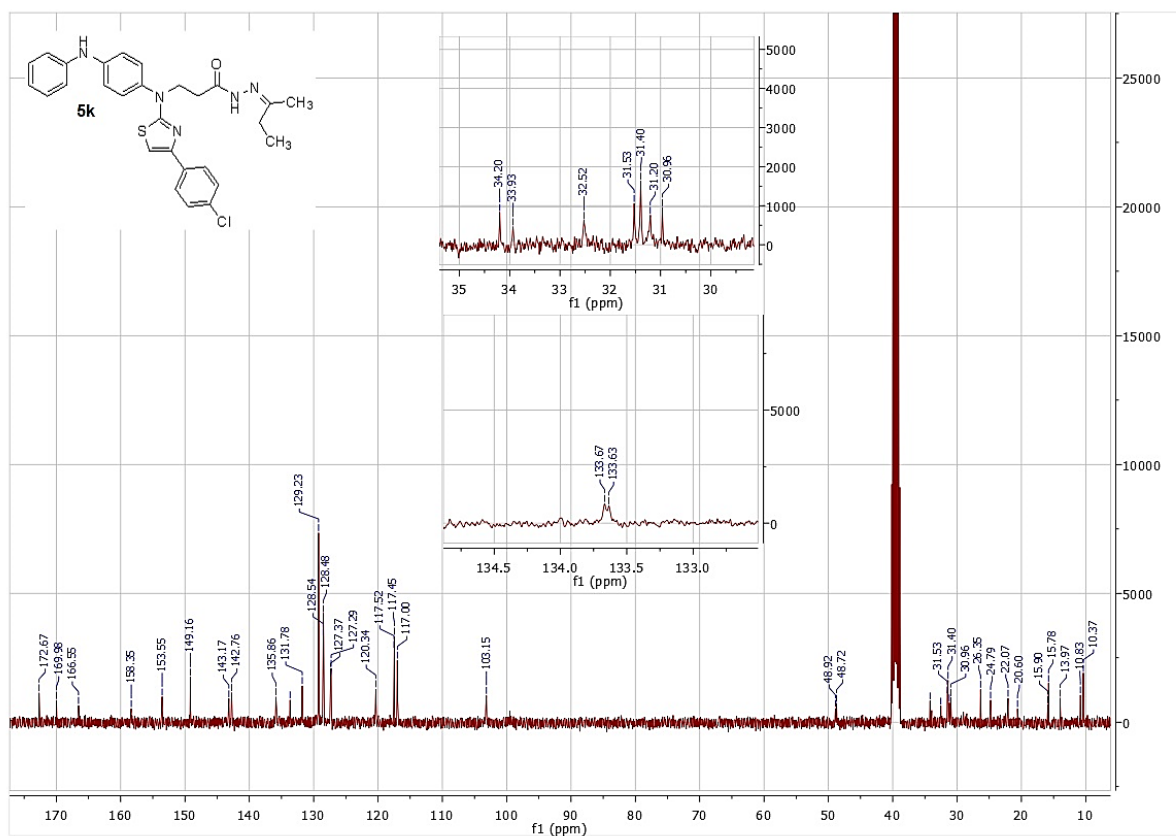

## Synthesis of azoles 6-9

3-((4-(4-chlorophenyl)thiazol-2-yl)(4-(phenylamino)phenyl)amino)-1-(3,5-dimethyl-1H-pyrazol-1-yl)propan-1-one (**6**)

Figure S35: <sup>1</sup>H NMR of compound **6**

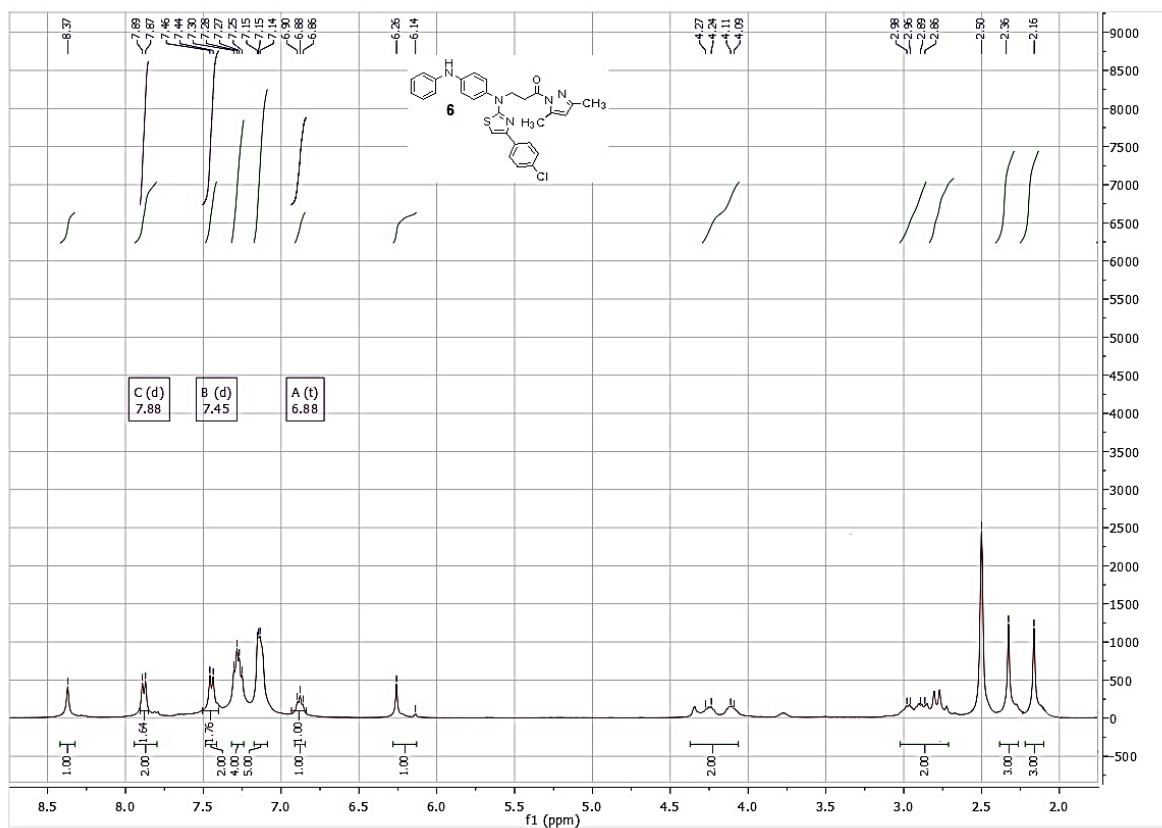

Figure S36: <sup>13</sup>C NMR of compound **6**

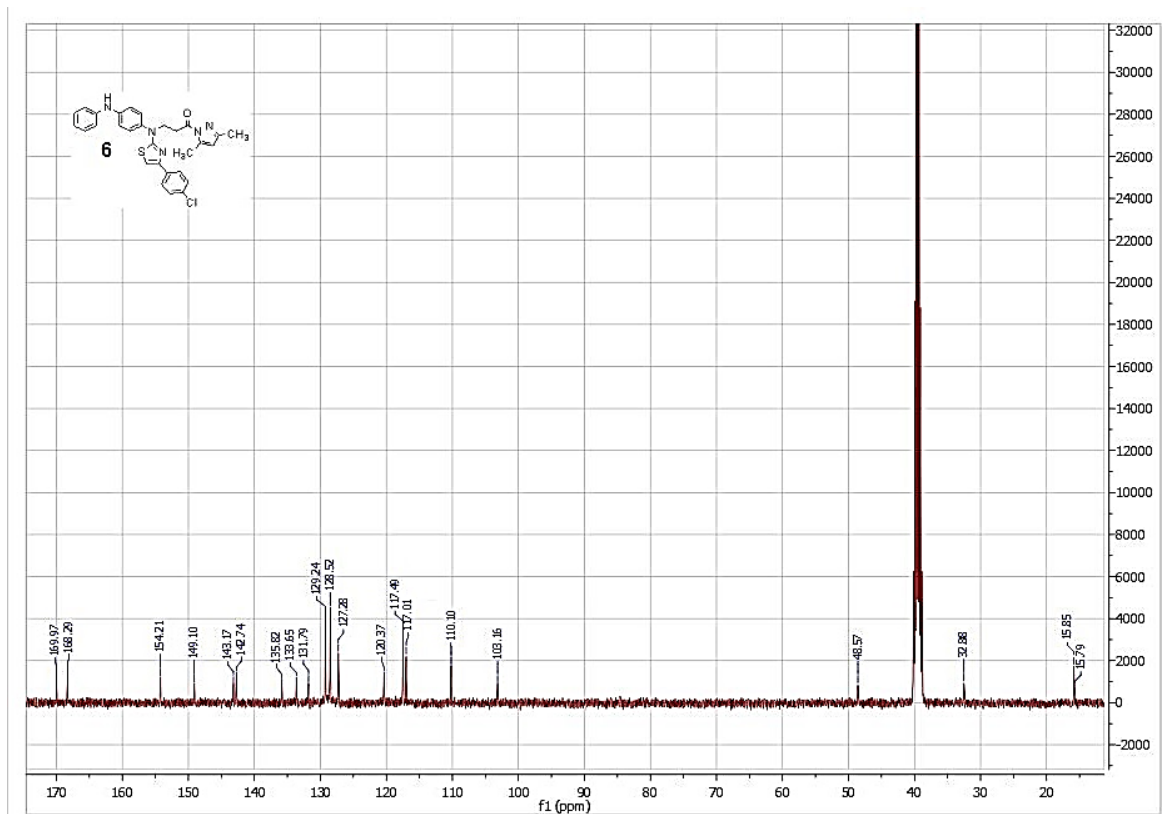

2-(3-((4-(4-chlorophenyl)thiazol-2-yl)(4-(phenylamino)phenyl)amino)-N-(2,5-dimethyl-1H-pyrrol-1-yl)propanamide (**7**)  
**Figure S37:**  $^1\text{H}$  NMR of compound **7**

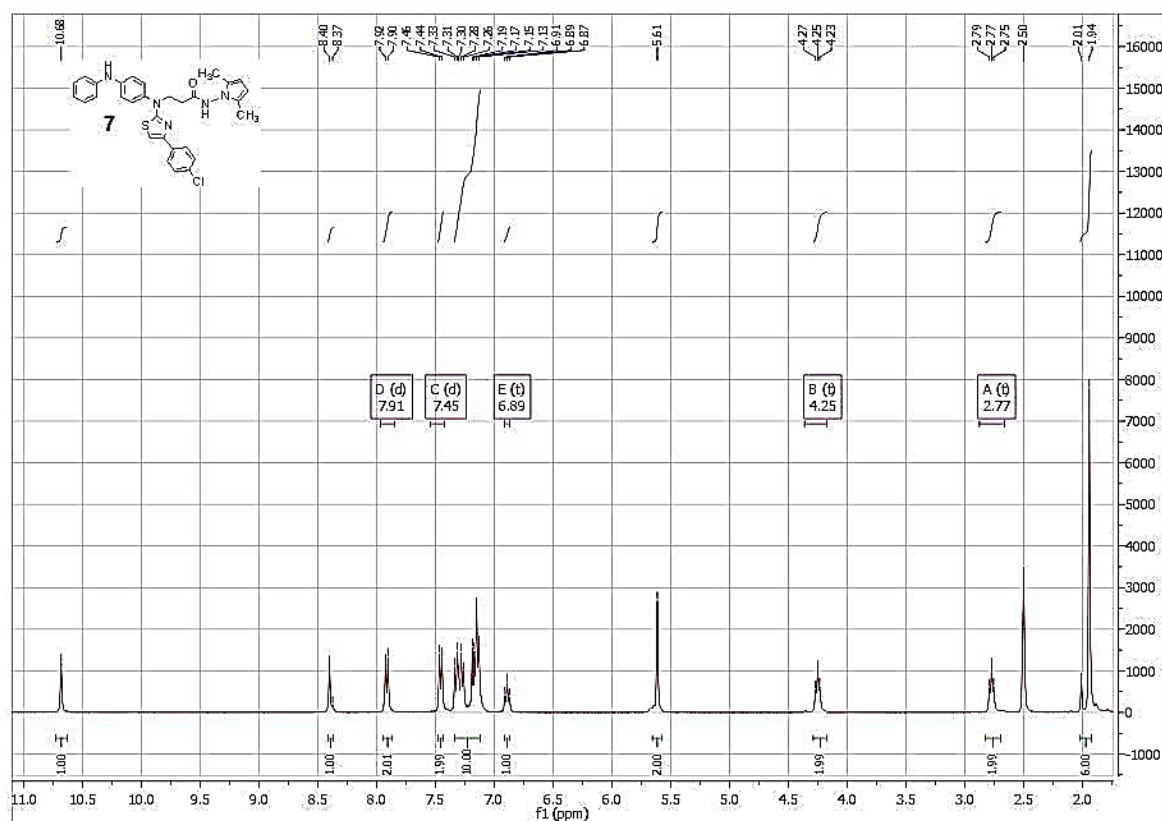

**Figure S38:**  $^{13}\text{C}$  NMR of compound **7**

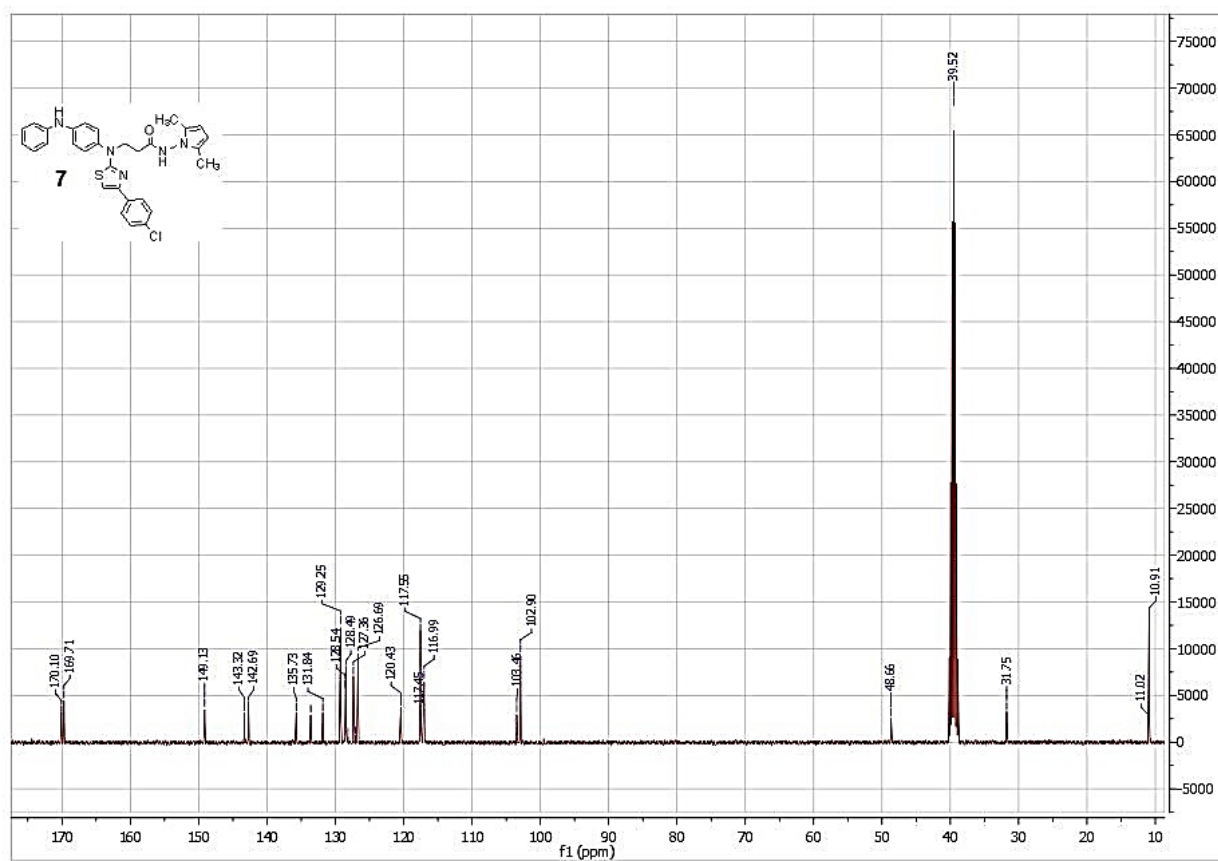

2-(3-((4-(4-chlorophenyl)thiazol-2-yl)(4-(phenylamino)phenyl)amino)propanoyl)-N-phenylhydrazine-1-carbothioamide (**8**)  
**Figure S39:**  $^1\text{H}$  NMR of compound **8**

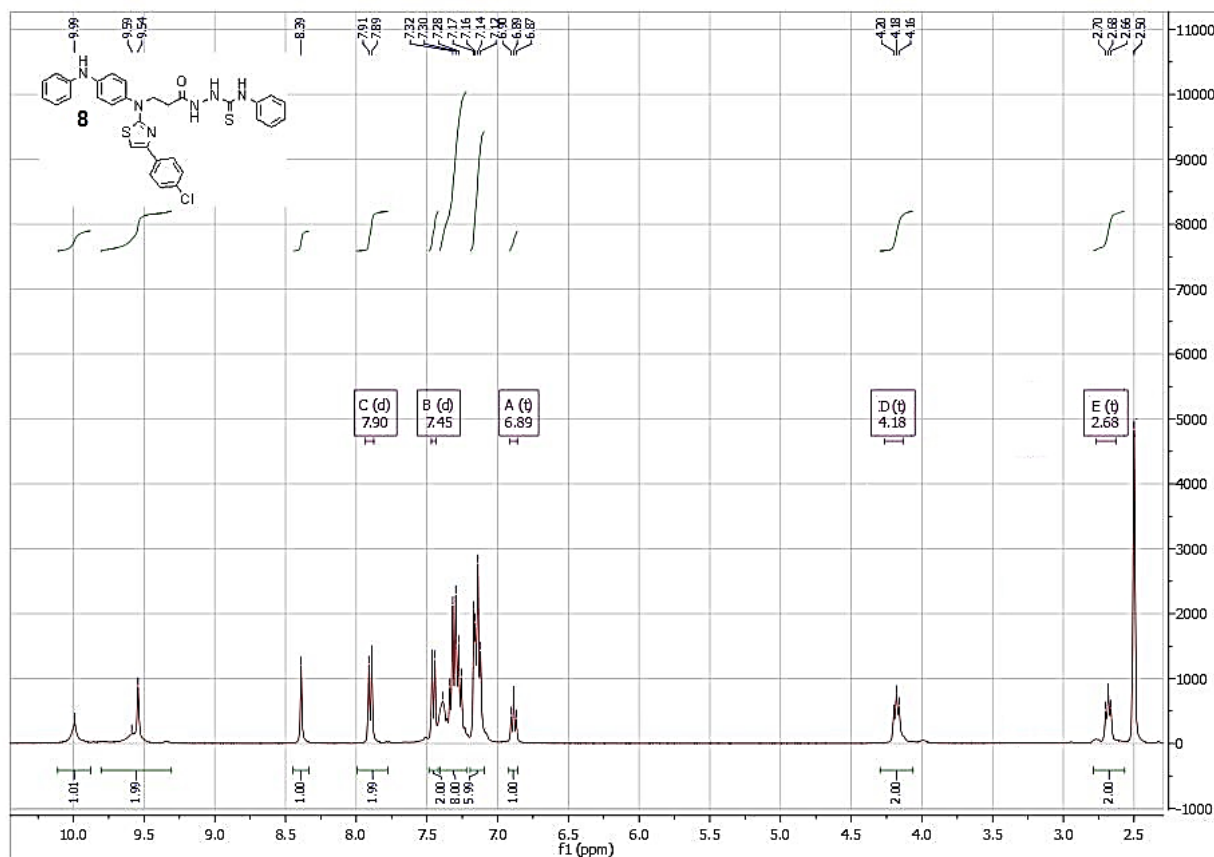

**Figure S40:**  $^{13}\text{C}$  NMR of compound **8**

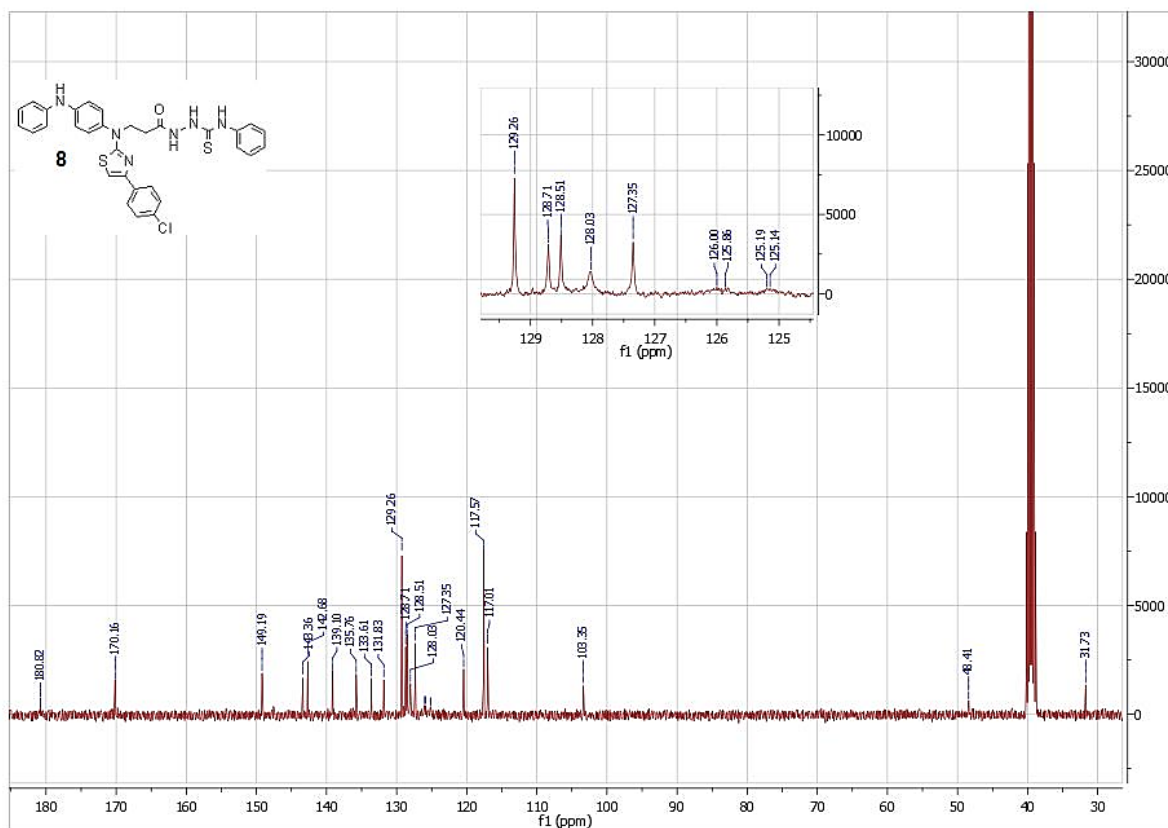

5-(2-((4-(4-chlorophenyl)thiazol-2-yl)(4-(phenylamino)phenyl)amino)ethyl)-4-phenyl-2,4-dihydro-3H-1,2,4-triazole-3-thione (**9**)  
**Figure S41:**  $^1\text{H}$  NMR of compound **9**

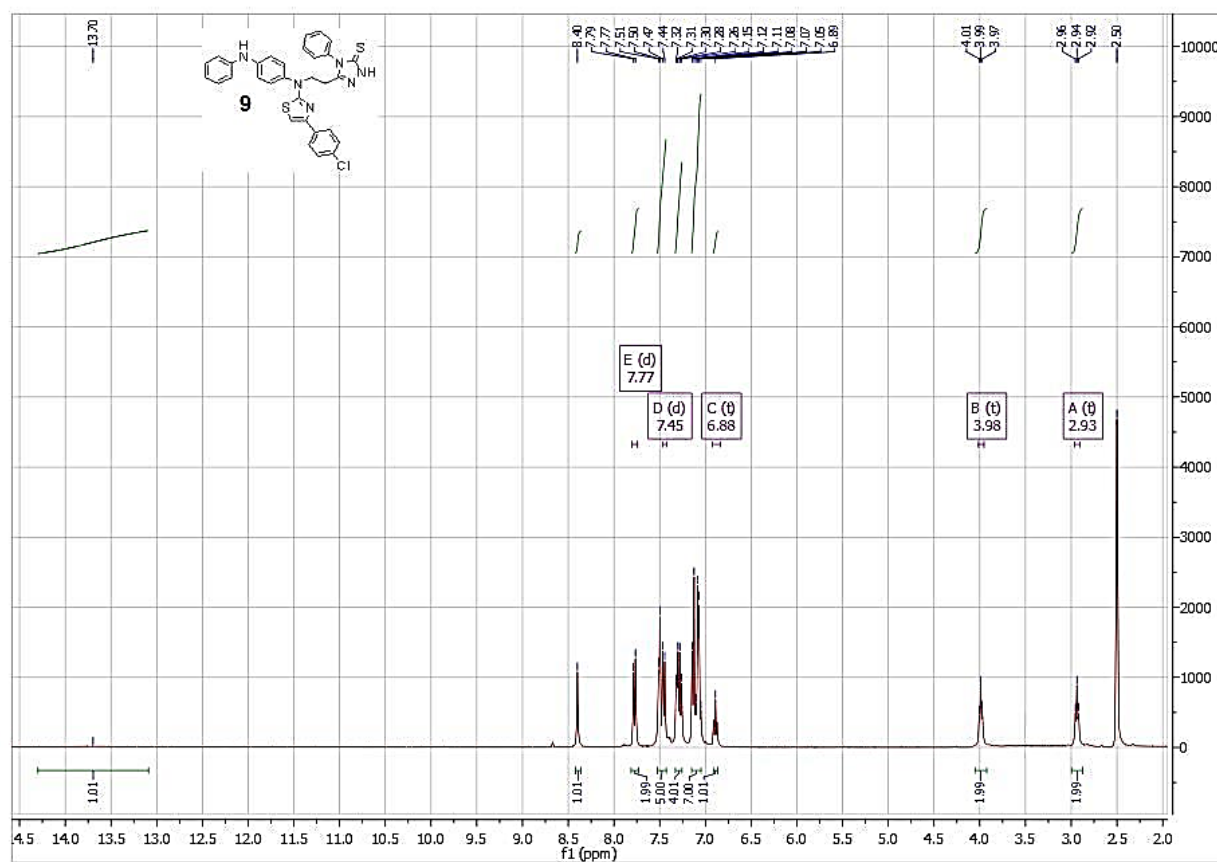

**Figure S42:**  $^{13}\text{C}$  NMR of compound **9**

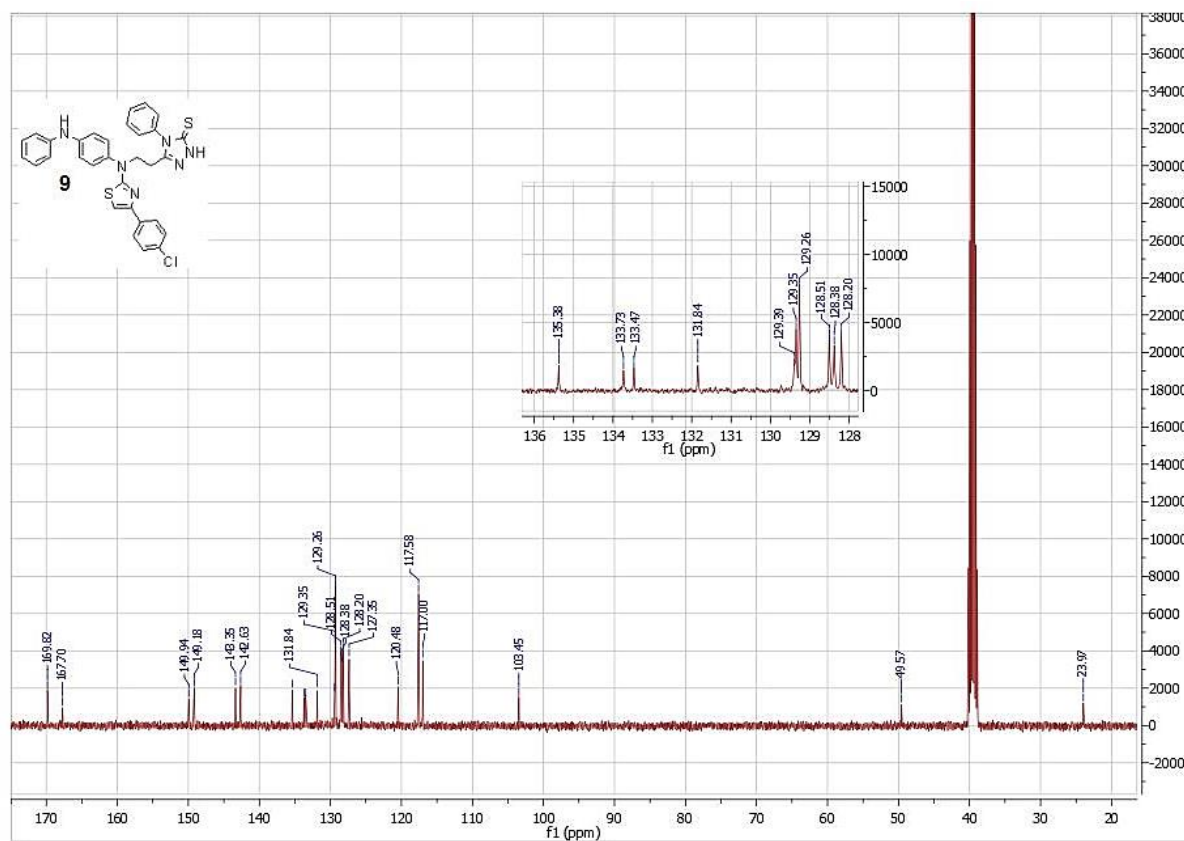

**Table S1.** The list of fungal strains used for the study

| <b>Fungi</b>                    | <b>Isolate number</b> | <b>Strain feature</b>                      | <b>Source</b>     |
|---------------------------------|-----------------------|--------------------------------------------|-------------------|
| <i>Aspergillus fumigatus</i>    | 731                   | Azole resistance, L98H, TR34               | CDC               |
| <i>Aspergillus fumigatus</i>    | 732                   | Azole resistance, F495I, L98H, S297T, TR34 | CDC               |
| <i>Aspergillus fumigatus</i>    | 2122                  | Pan-susceptible                            | Laboratory strain |
| <i>Candida auris</i>            | 381                   | Azole resistant                            | CDC               |
| <i>Candida auris</i>            | 382                   | Azole resistant                            | CDC               |
| <i>Candida auris</i>            | 383                   | Azole resistant                            | CDC               |
| <i>Candida auris</i>            | 384                   | Azole resistant                            | CDC               |
| <i>Candida duobushaemulonii</i> | 389                   | Azole resistant                            | CDC               |
| <i>Candida krusei</i>           | 397                   | Azole resistant                            | CDC               |
| <i>Candida albicans</i>         | 1214                  | Azole resistant                            | Laboratory strain |

**Abbreviations:** ATCC-American Type Culture Collection; CDC – Center for Disease Control.
